# Supplementary material for: Machine learning predicts individual cancer patient responses to therapeutic drugs with high accuracy
Source: PubMed Central journal article supplement (PMC6219522; doi:10.1038/s41598-018-34753-5), 2018-11-06
Supplement: 41598_2018_34753_MOESM1_ESM.pdf [file 41598_2018_34753_MOESM1_ESM.pdf]

**Supplementary Information for:**

**Machine learning predicts individual cancer patient responses to therapeutic drugs with high accuracy**

Cai Huang<sup>1</sup>, Evan A. Clayton<sup>1</sup>, Lilya V. Matyunina<sup>1</sup>, L. DeEtte McDonald<sup>1</sup>, Benedict B. Benigno<sup>2,3</sup>,  
Fredrik Vannberg<sup>1,2,‡</sup>, and John F. McDonald<sup>1,2,3,‡, \*</sup>

<sup>1</sup>School of Biological Sciences and Petit Institute for Bioengineering and Bioscience, Georgia Institute of Technology, 315 Ferst Drive, Atlanta, GA 30332, USA.

<sup>2</sup>Integrated Cancer Research Center, Georgia Institute of Technology, 315 Ferst Drive, Atlanta, GA 30332, USA.

<sup>3</sup>Ovarian Cancer Institute, 960 Johnson Ferry Road, Atlanta, GA, 30342, USA.

‡ these authors contributed equally to the work

\*To whom correspondence should be addressed:

John F. McDonald, Georgia Institute of Technology, 315 Ferst Drive, Atlanta, GA, 30332, USA;

Phone: 404-385-6630; FAX: 404-894-2291; email: john.mcdonald@biology.gatech.edu

**Supplementary Fig. S1.** The predicted response scores of each of the 23 ovarian cancer patients analyzed in this study (red lines) are plotted over the distribution of the previously predicted scores of 273 ovarian cancer patients<sup>6</sup> for eight chemotherapeutic drugs.

# Patient 229

Carboplatin

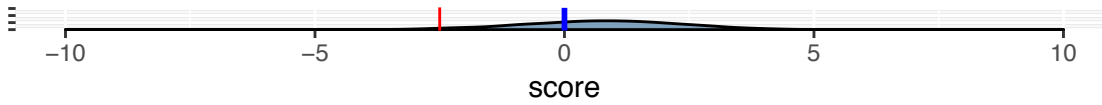

Paclitaxel

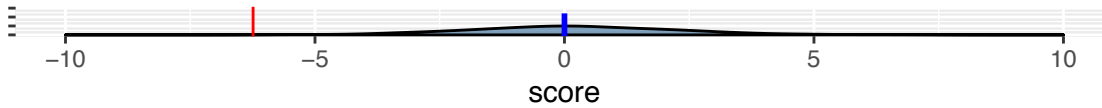

Docetaxel

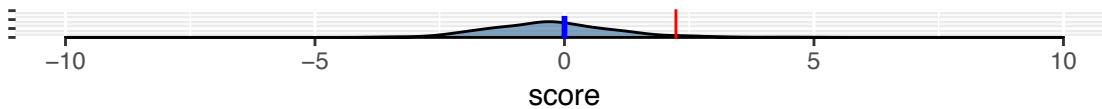

Doxorubicin

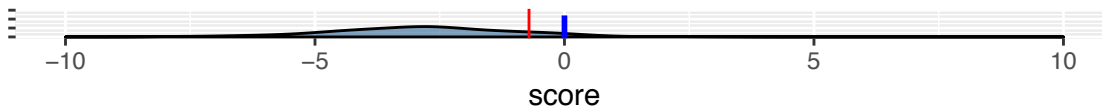

Cisplatin

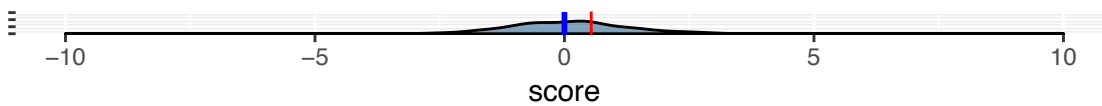

Gefitinib

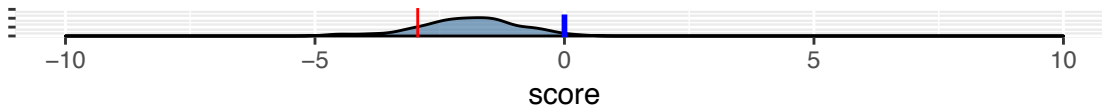

Gemcitabine

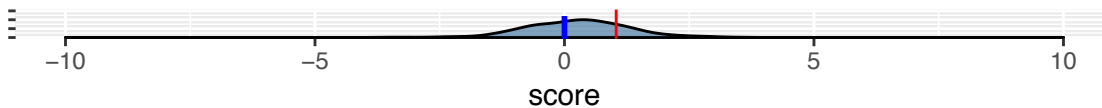

Topotecan

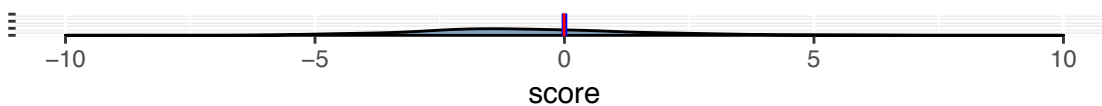

# Patient 242

Carboplatin

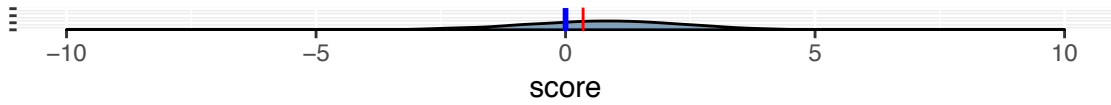

Paclitaxel

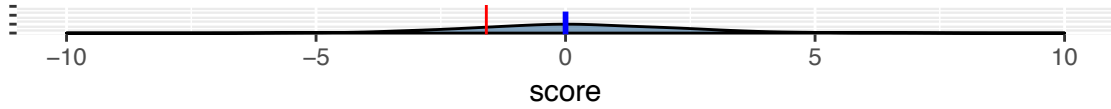

Docetaxel

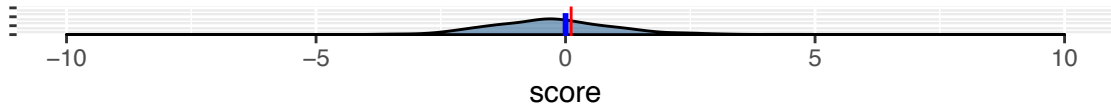

Doxorubicin

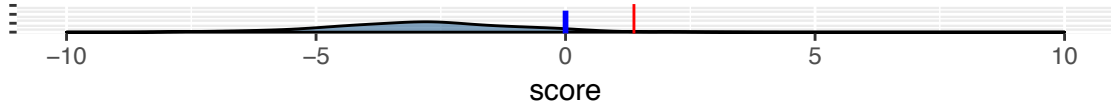

Cisplatin

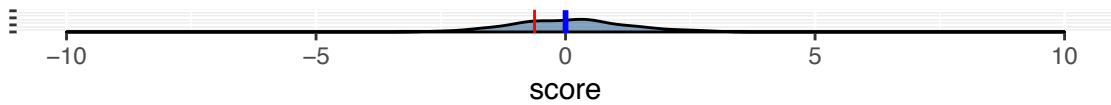

Gefitinib

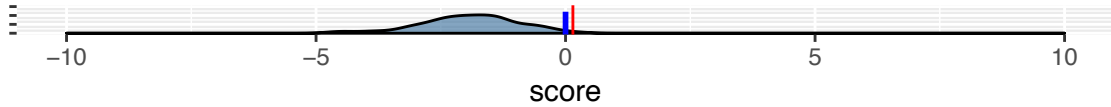

Gemcitabine

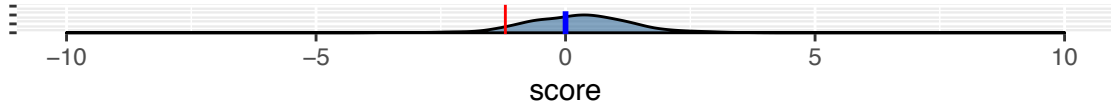

Topotecan

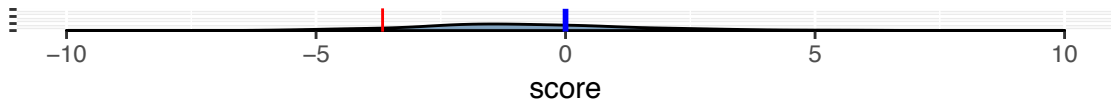

# Patient 272

Carboplatin

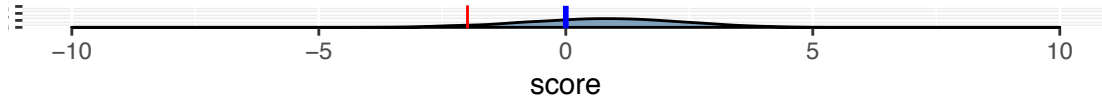

Paclitaxel

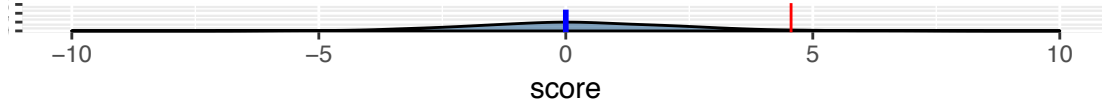

Docetaxel

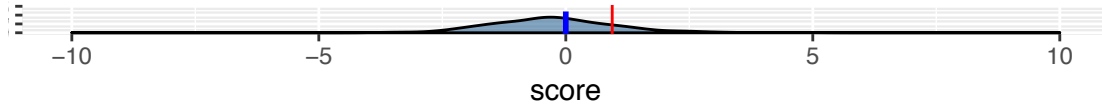

Doxorubicin

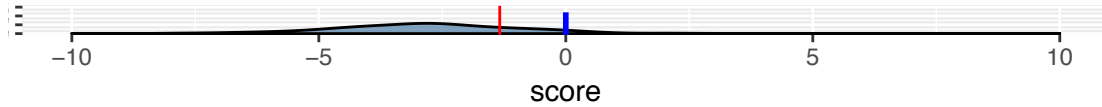

Cisplatin

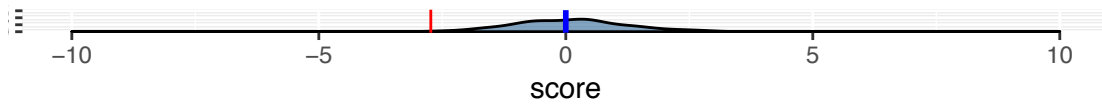

Gefitinib

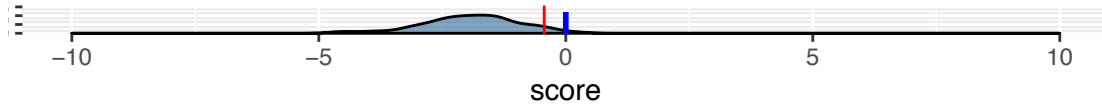

Gemcitabine

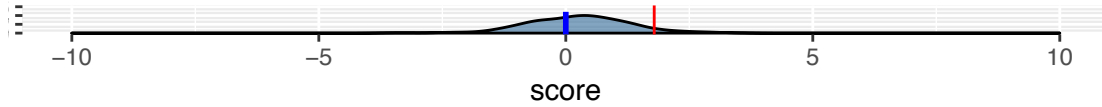

Topotecan

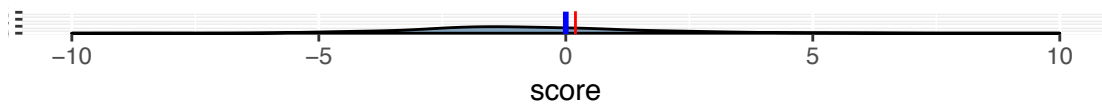

# Patient 286

Carboplatin

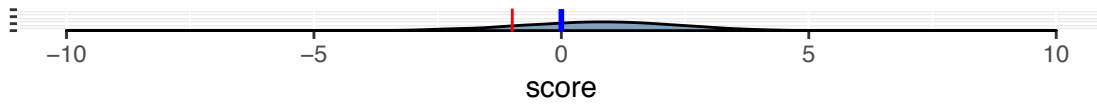

Paclitaxel

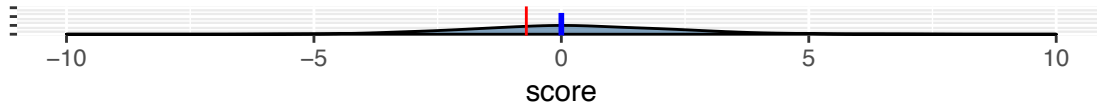

Docetaxel

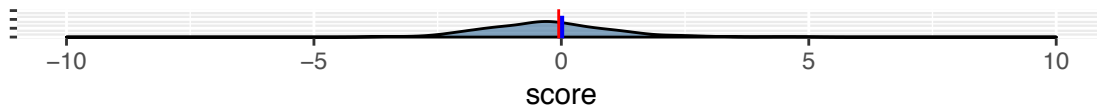

Doxorubicin

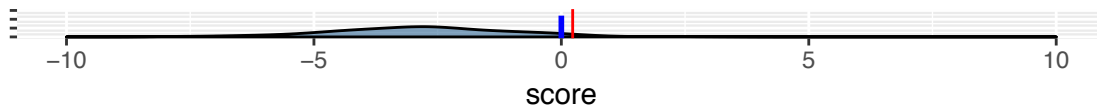

Cisplatin

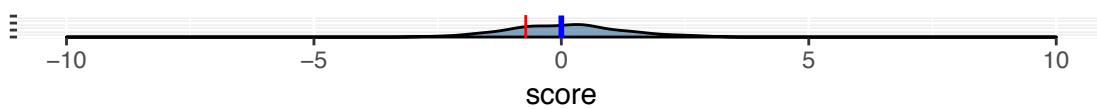

Gefitinib

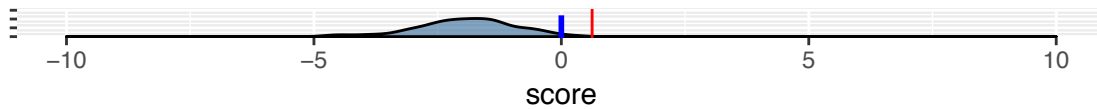

Gemcitabine

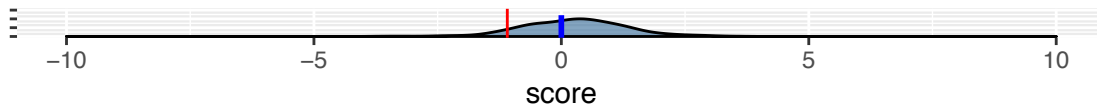

Topotecan

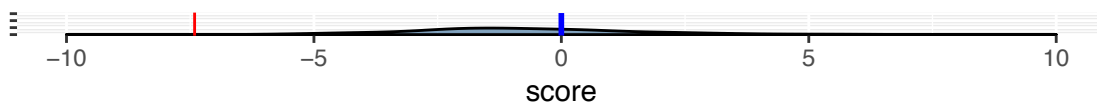

# Patient 317

Carboplatin

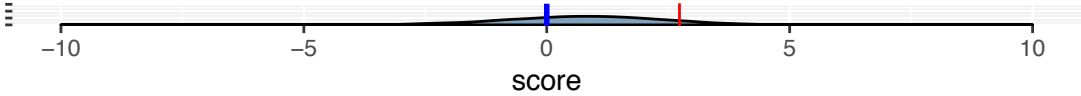

Paclitaxel

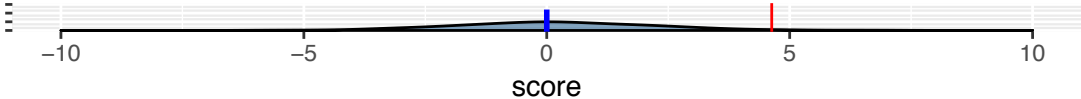

Docetaxel

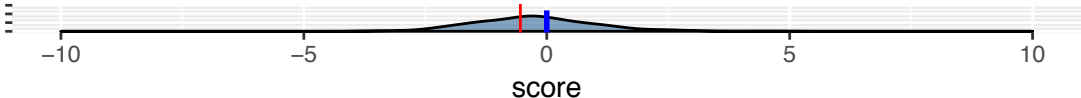

Doxorubicin

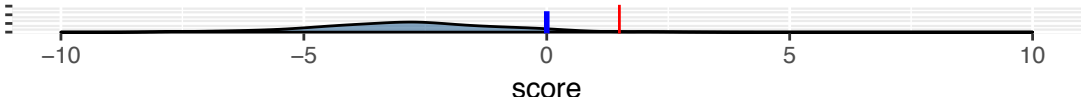

Cisplatin

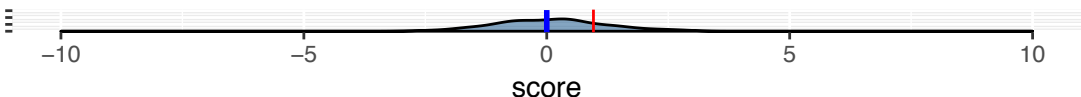

Gefitinib

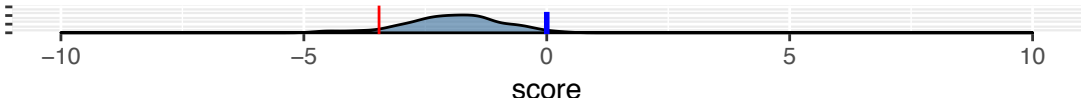

Gemcitabine

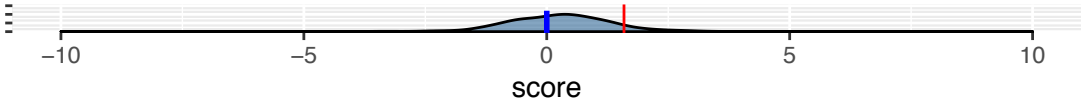

Topotecan

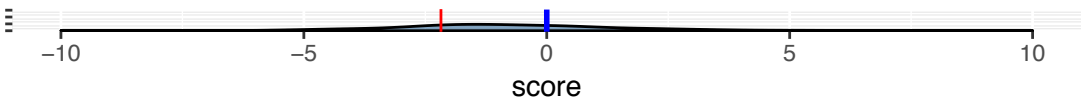

# Patient 336

Carboplatin

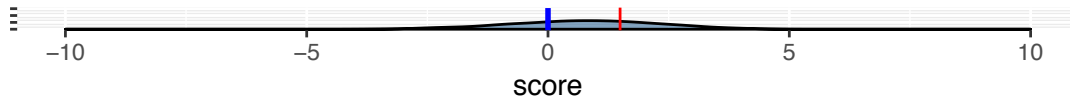

Paclitaxel

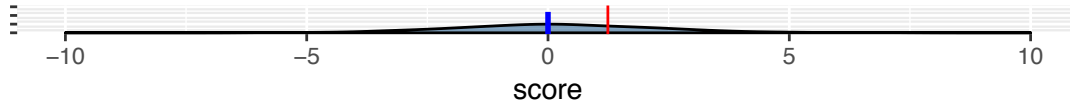

Docetaxel

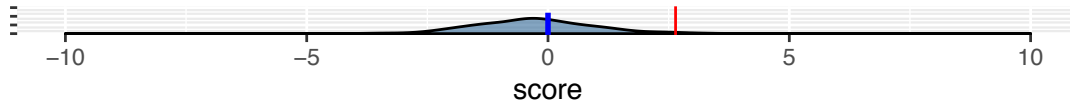

Doxorubicin

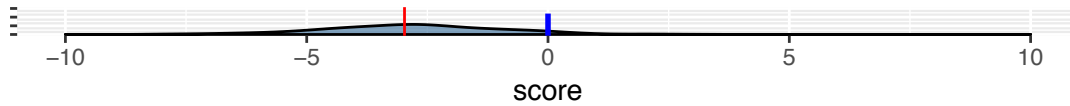

Cisplatin

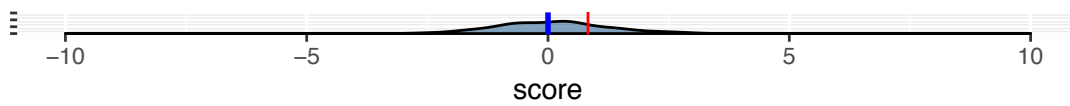

Gefitinib

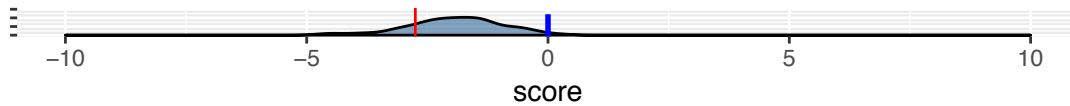

Gemcitabine

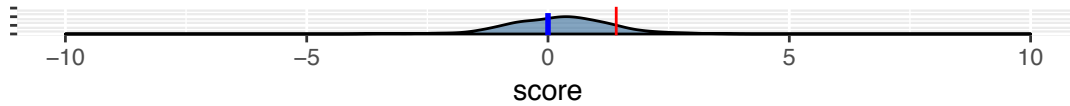

Topotecan

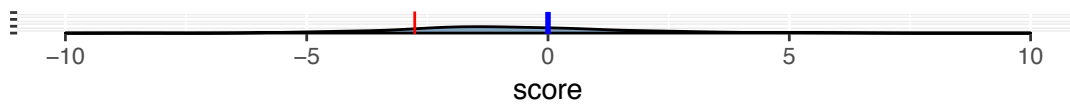

# Patient 367

Carboplatin

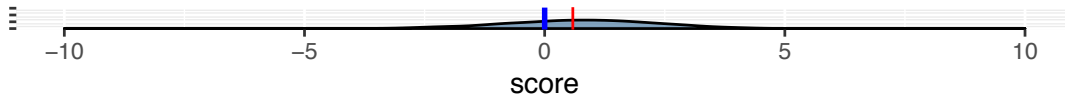

Paclitaxel

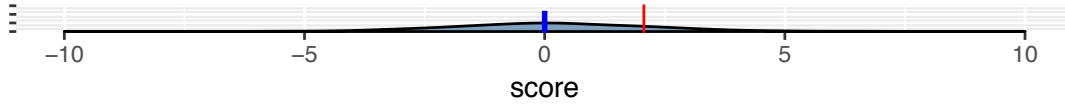

Docetaxel

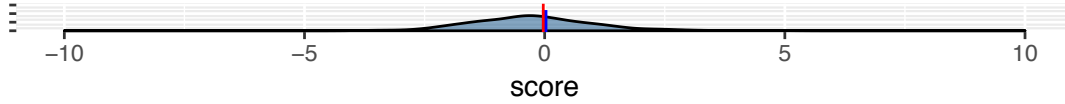

Doxorubicin

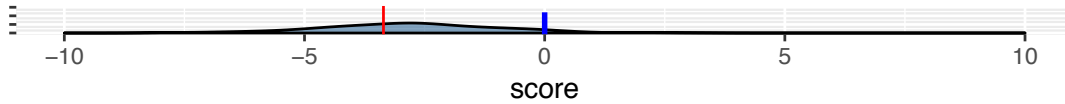

Cisplatin

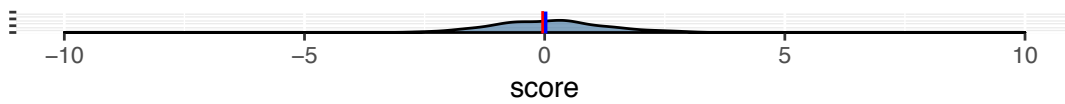

Gefitinib

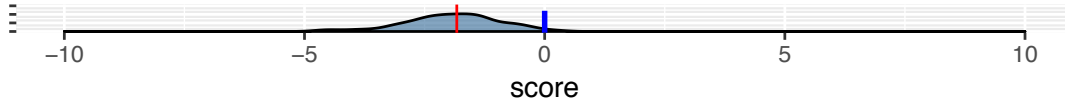

Gemcitabine

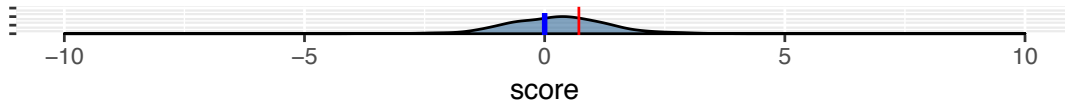

Topotecan

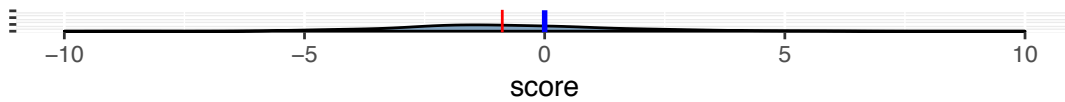



# Patient 413

Carboplatin

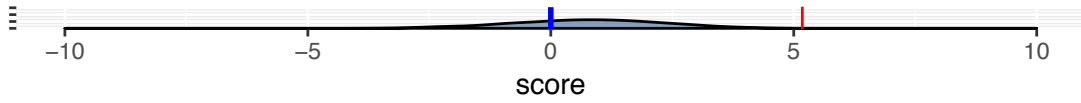

Paclitaxel

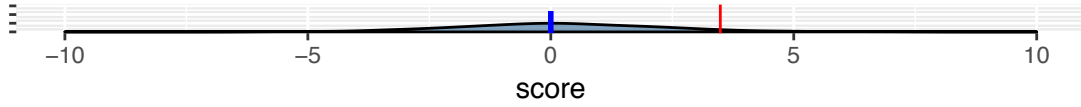

Docetaxel

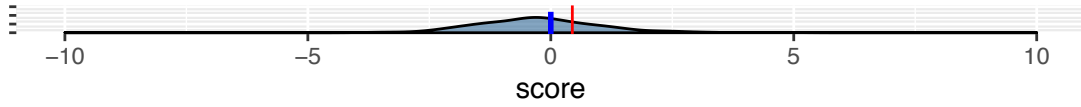

Doxorubicin

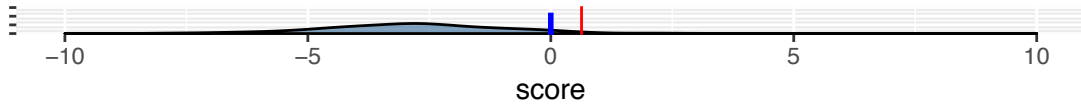

Cisplatin

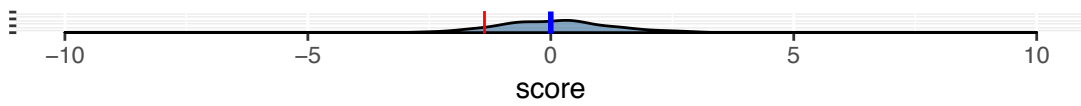

Gefitinib

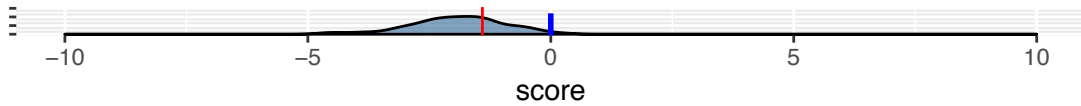

Gemcitabine

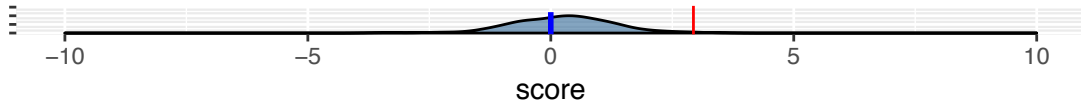

Topotecan

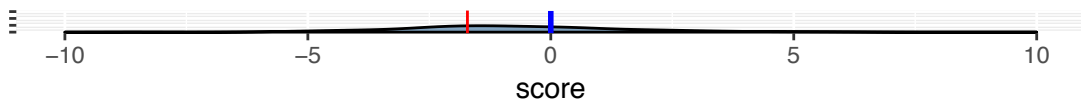

# Patient 489

Carboplatin

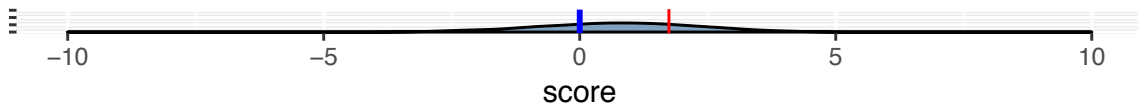

Paclitaxel

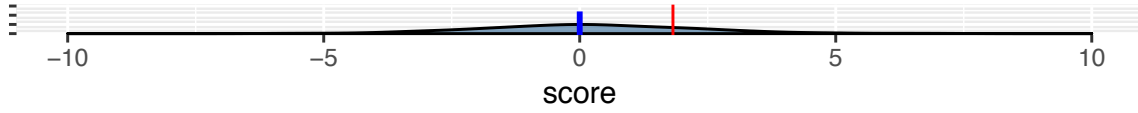

Docetaxel

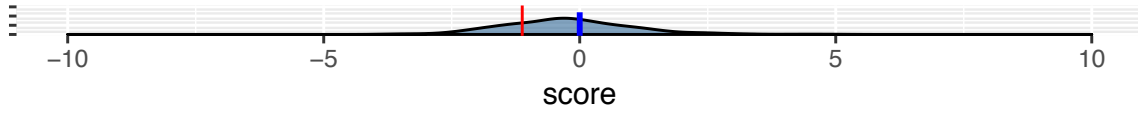

Doxorubicin

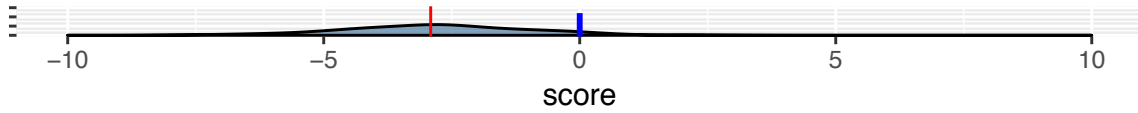

Cisplatin

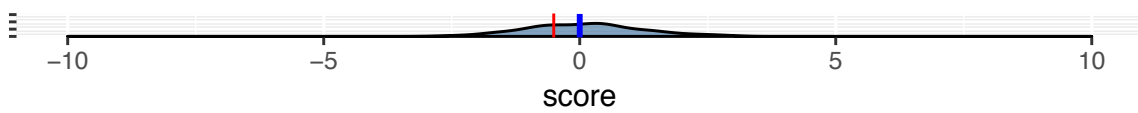

Gefitinib

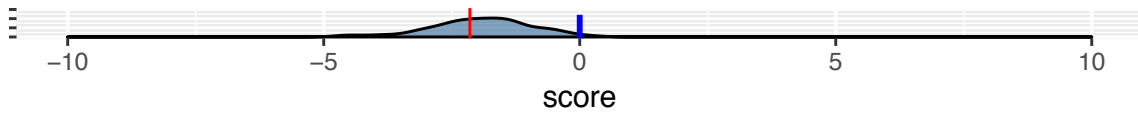

Gemcitabine

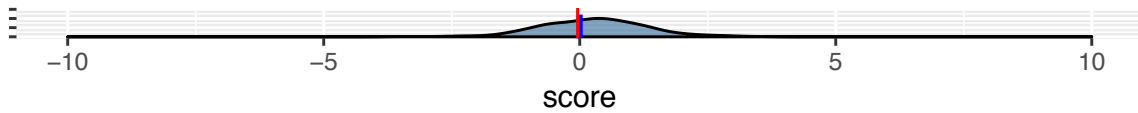

Topotecan

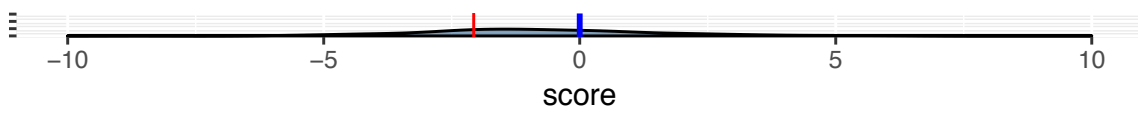

# Patient 528

Carboplatin

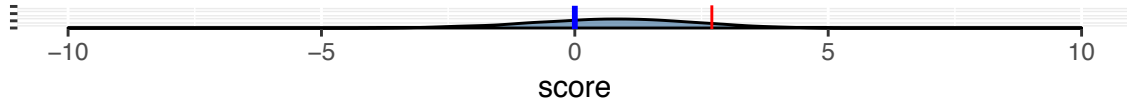

Paclitaxel

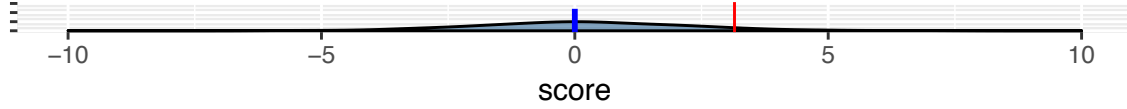

Docetaxel

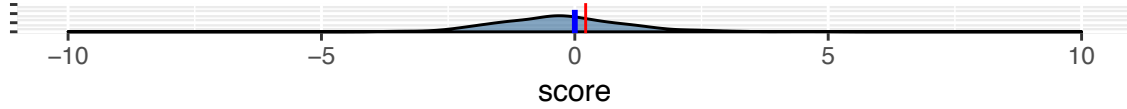

Doxorubicin

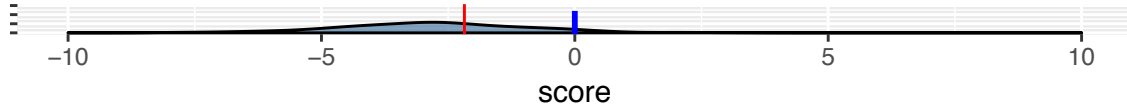

Cisplatin

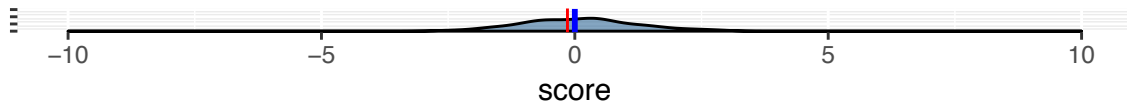

Gefitinib

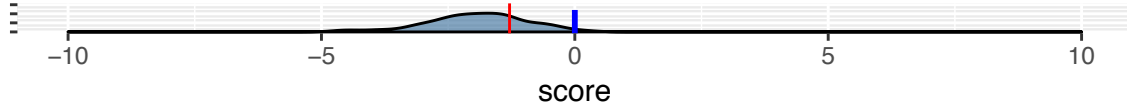

Gemcitabine

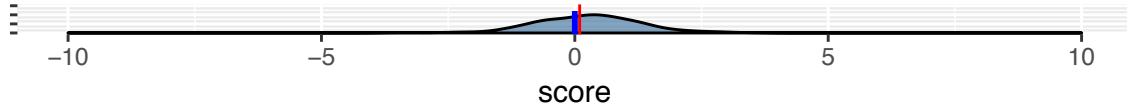

Topotecan

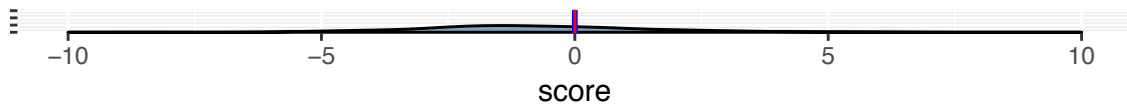

# Patient 542

Carboplatin

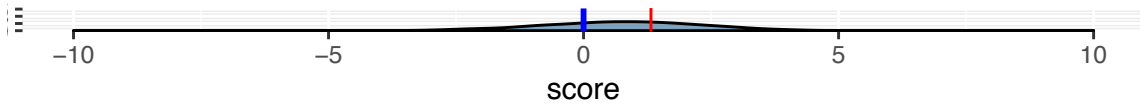

Paclitaxel

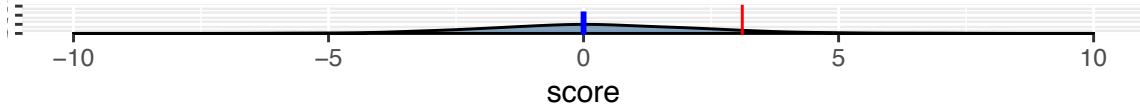

Docetaxel

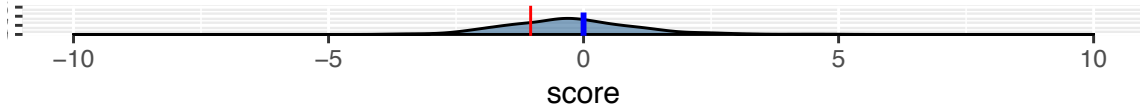

Doxorubicin

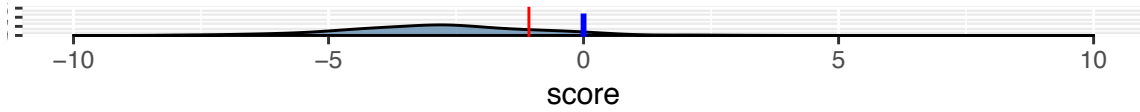

Cisplatin

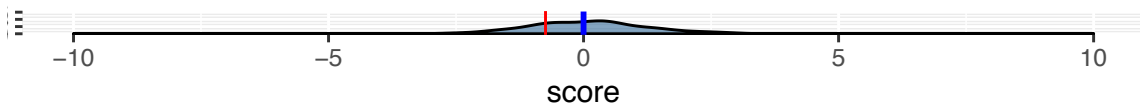

Gefitinib

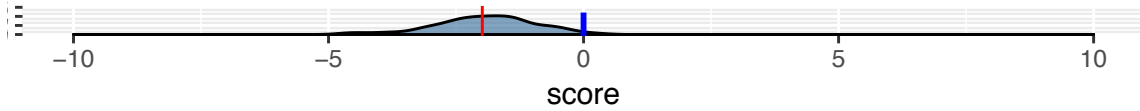

Gemcitabine

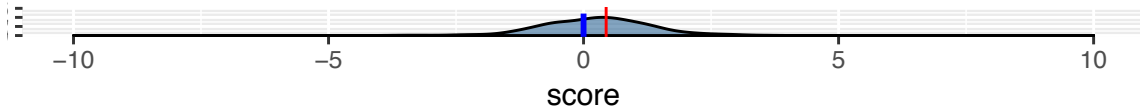

Topotecan

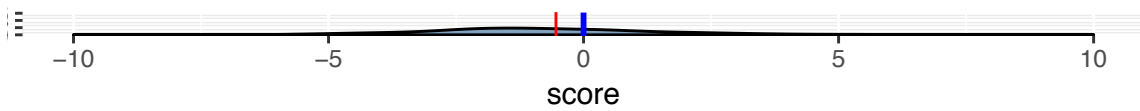

# Patient 545

Carboplatin

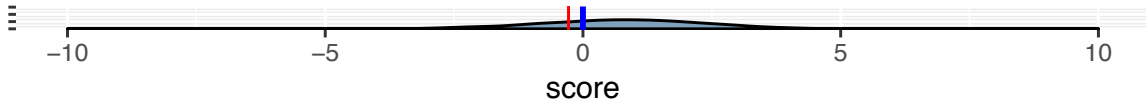

Paclitaxel

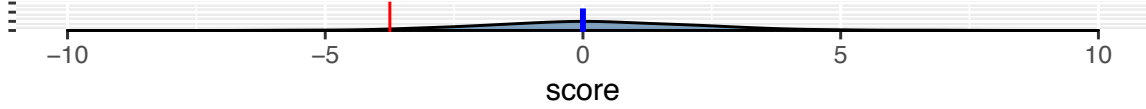

Docetaxel

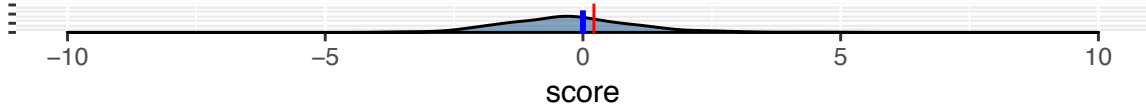

Doxorubicin

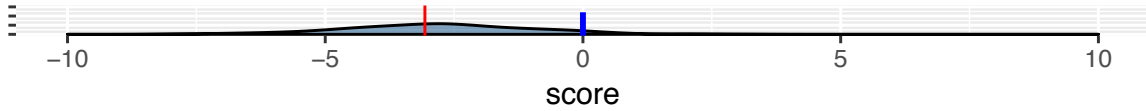

Cisplatin

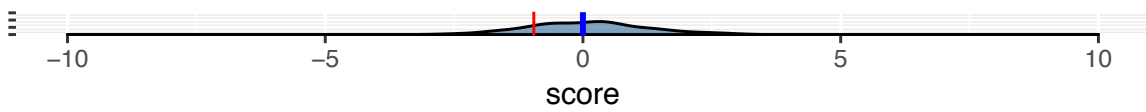

Gefitinib

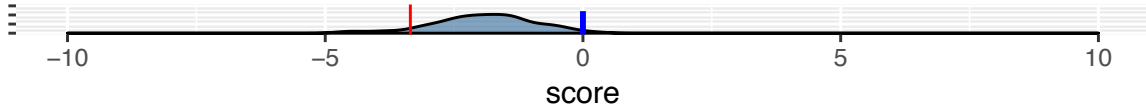

Gemcitabine

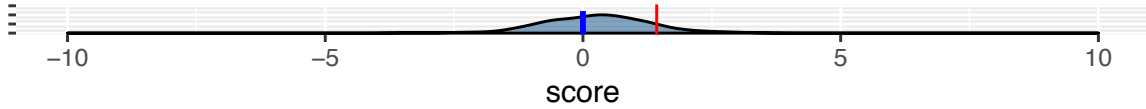

Topotecan

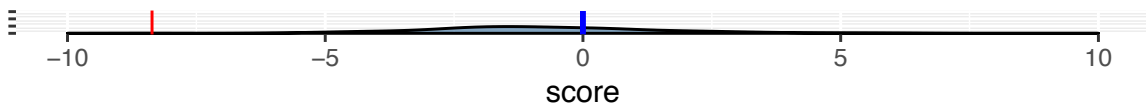

# Patient 588

Carboplatin

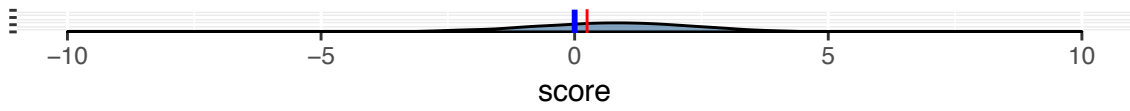

Paclitaxel

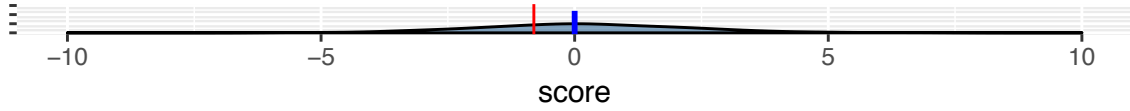

Docetaxel

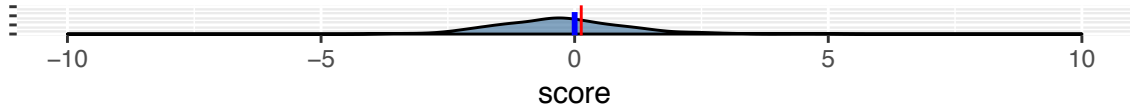

Doxorubicin

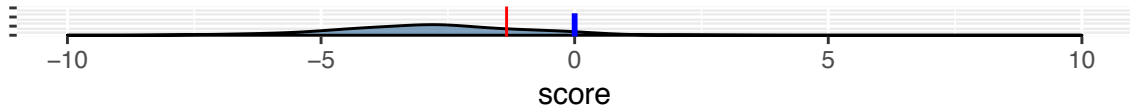

Cisplatin

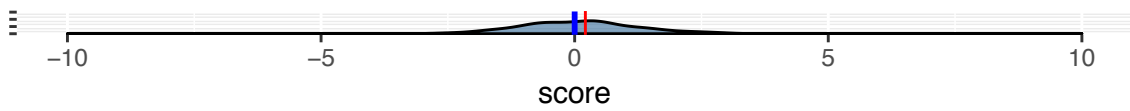

Gefitinib

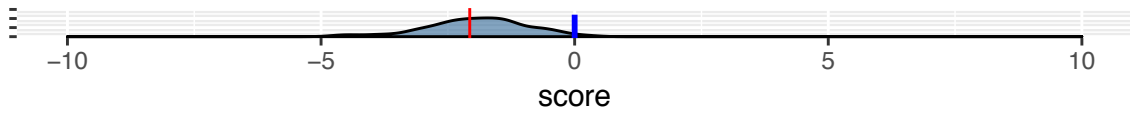

Gemcitabine

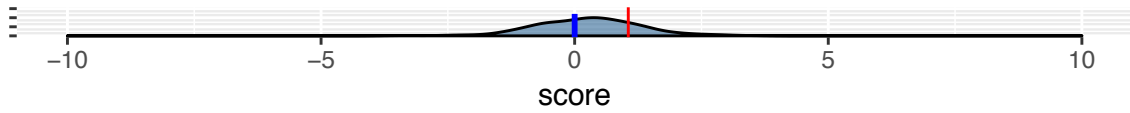

Topotecan

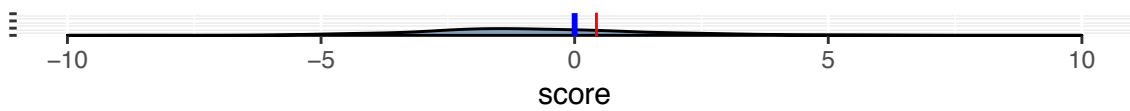

# Patient 617

Carboplatin

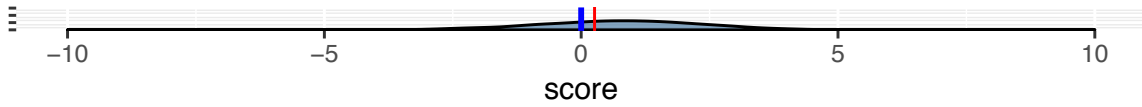

Paclitaxel

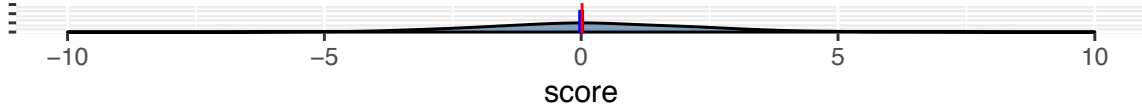

Docetaxel

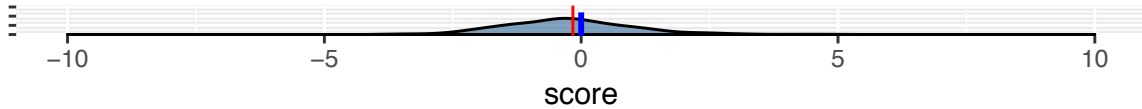

Doxorubicin

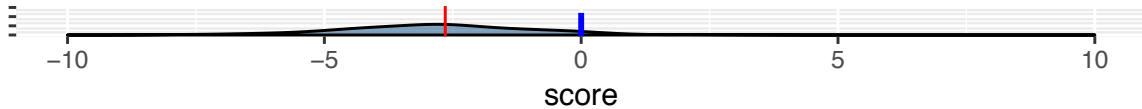

Cisplatin

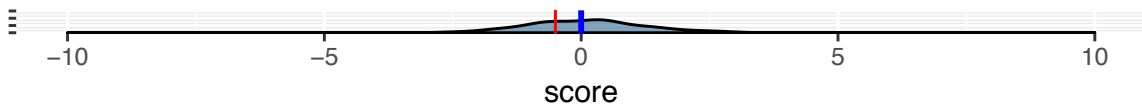

Gefitinib

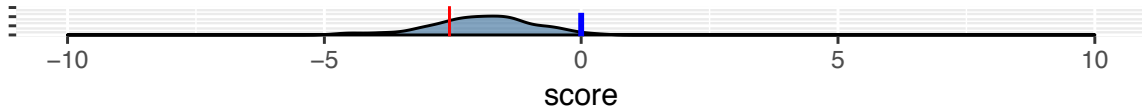

Gemcitabine

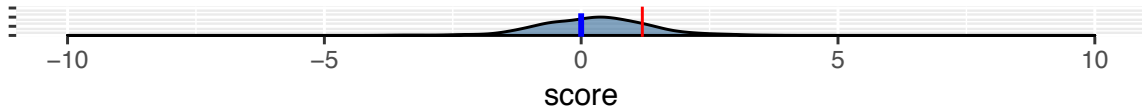

Topotecan

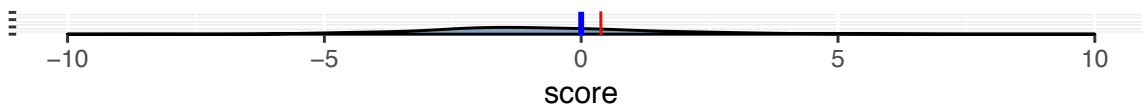

# Patient 620

Carboplatin

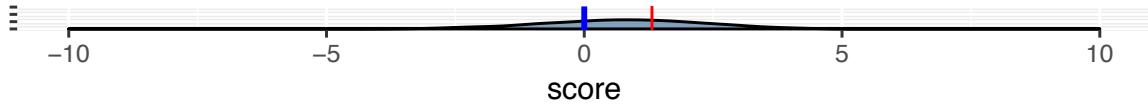

Paclitaxel

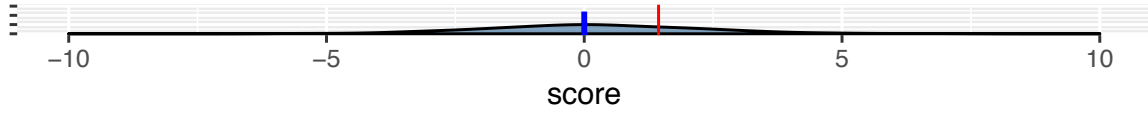

Docetaxel

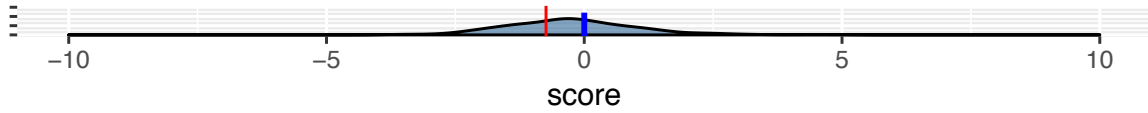

Doxorubicin

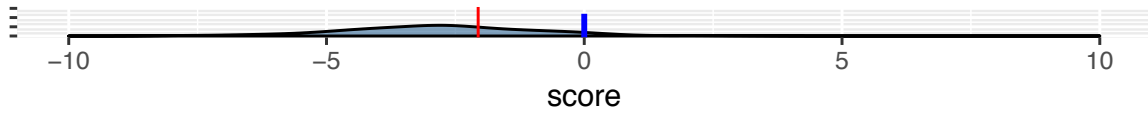

Cisplatin

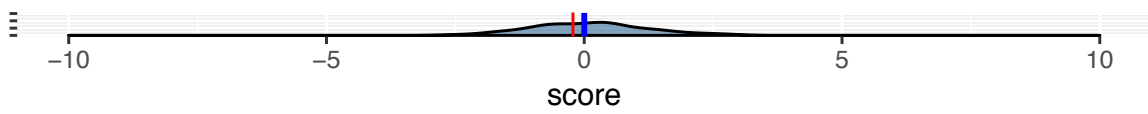

Gefitinib

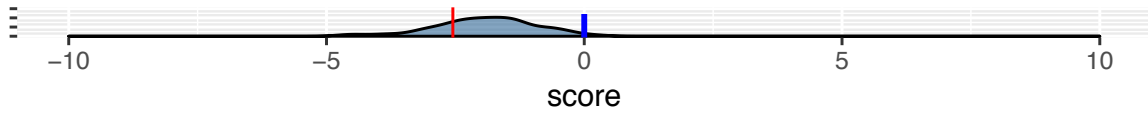

Gemcitabine

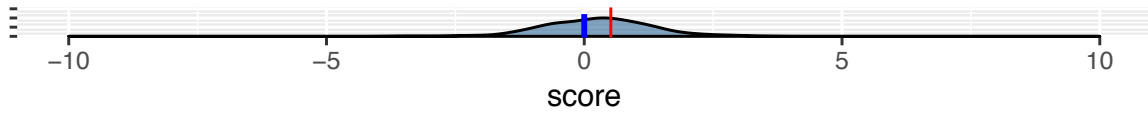

Topotecan

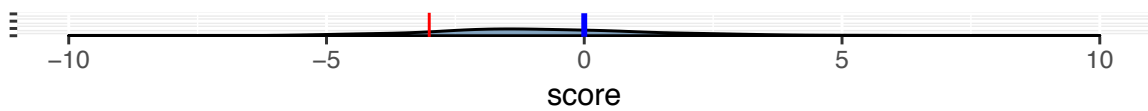



# Patient 813

Carboplatin

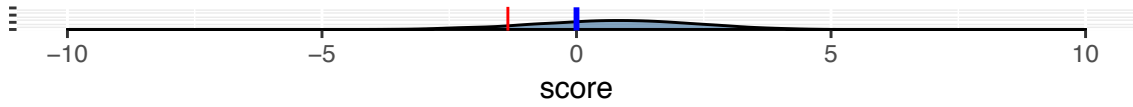

Paclitaxel

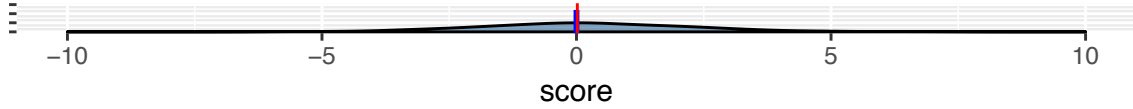

Docetaxel

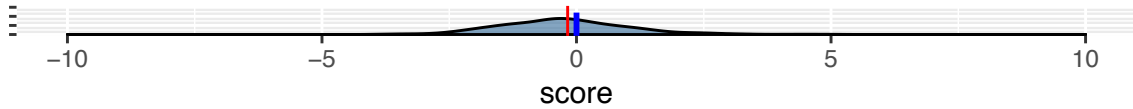

Doxorubicin

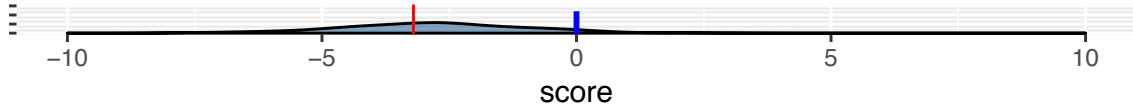

Cisplatin

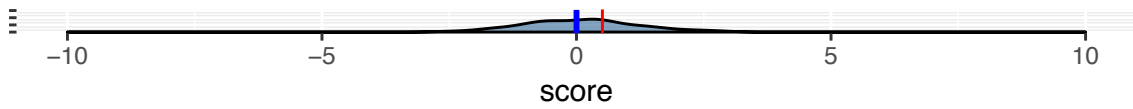

Gefitinib

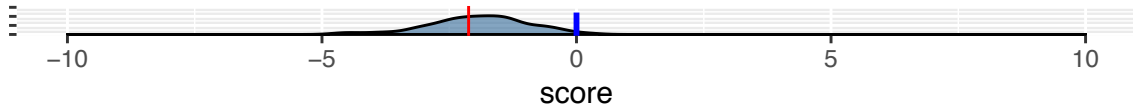

Gemcitabine

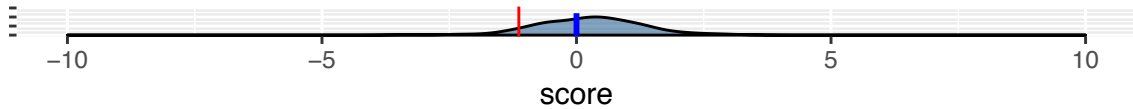

Topotecan

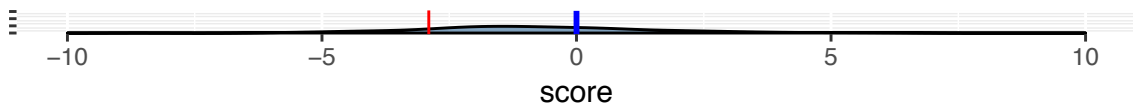

# Patient 992

Carboplatin

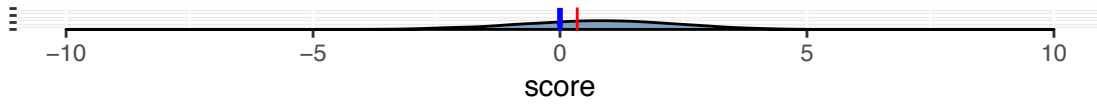

Paclitaxel

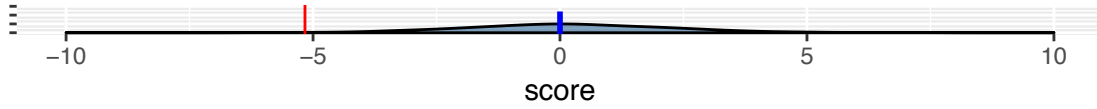

Docetaxel

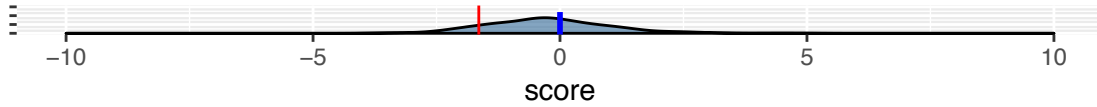

Doxorubicin

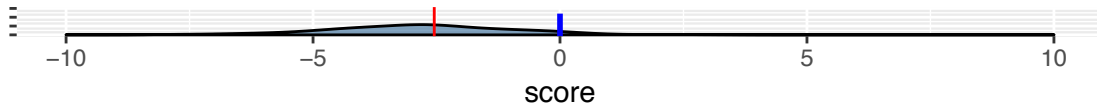

Cisplatin

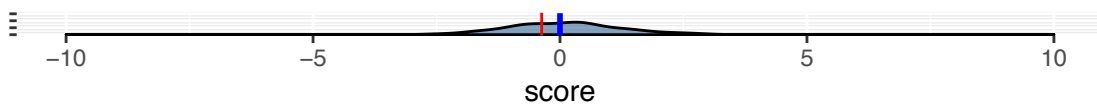

Gefitinib

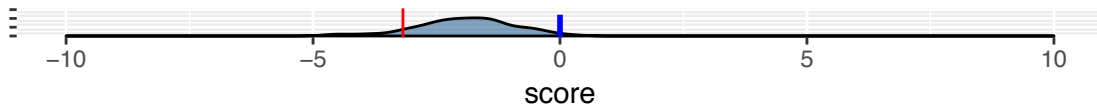

Gemcitabine

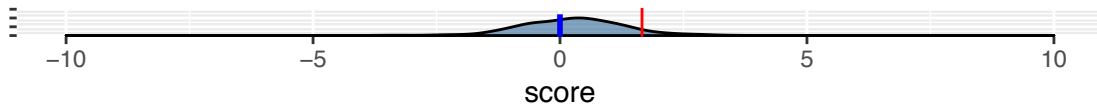

Topotecan

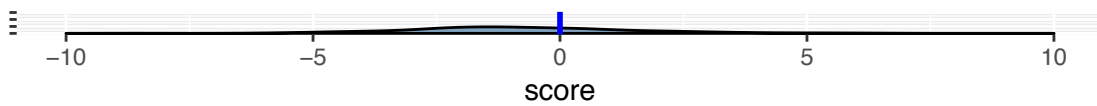

# Patient 1012

Carboplatin

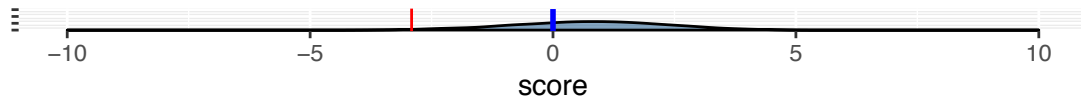

Paclitaxel

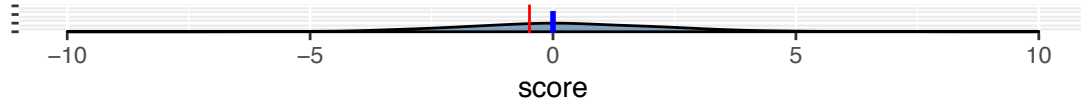

Docetaxel

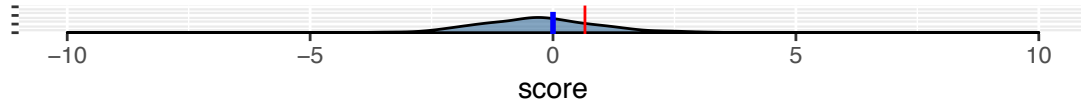

Doxorubicin

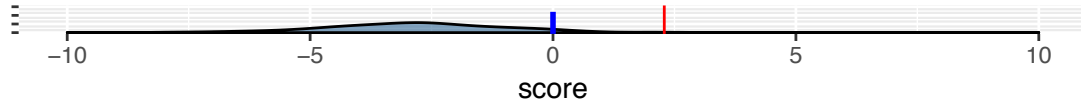

Cisplatin

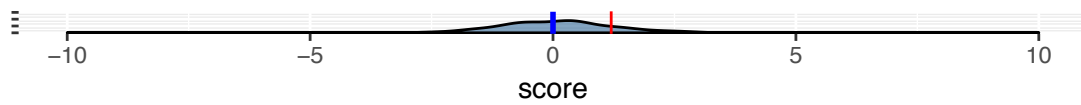

Gefitinib

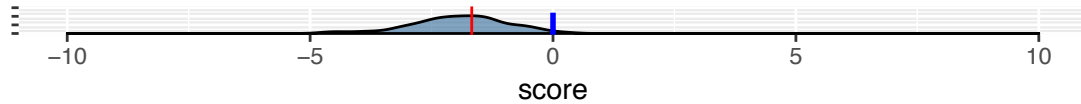

Gemcitabine

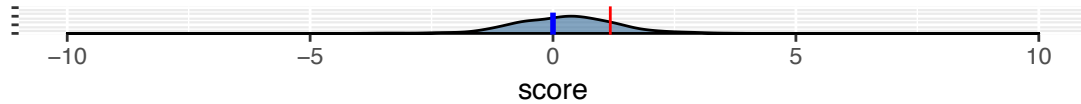

Topotecan

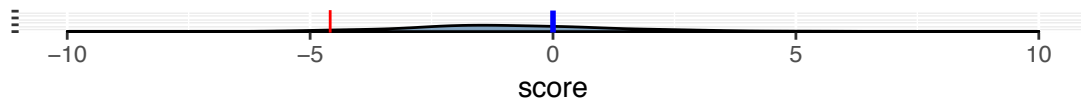

# Patient 1122

Carboplatin

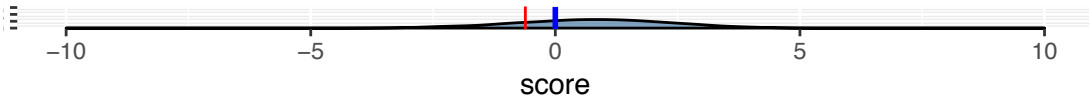

Paclitaxel

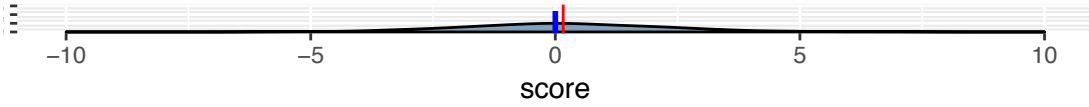

Docetaxel

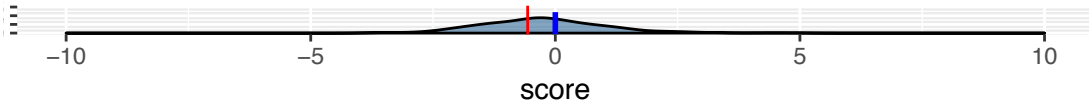

Doxorubicin

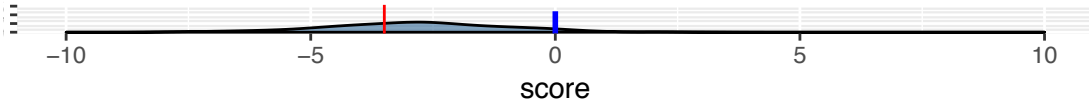

Cisplatin

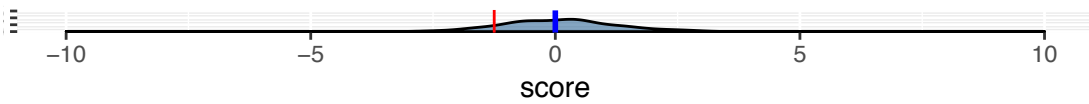

Gefitinib

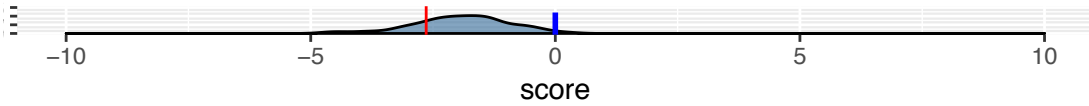

Gemcitabine

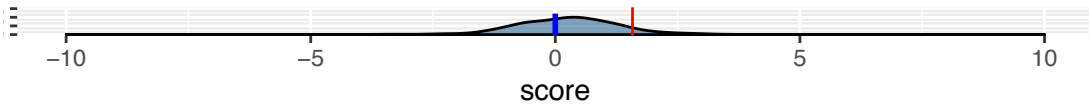

Topotecan

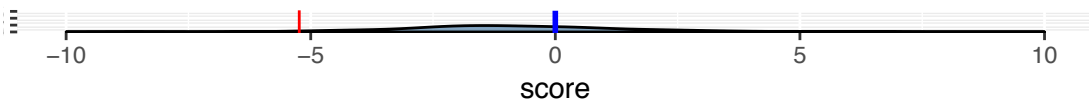

# Patient 1129

Carboplatin

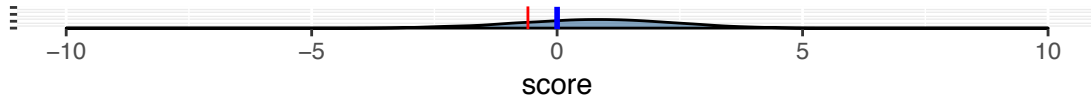

Paclitaxel

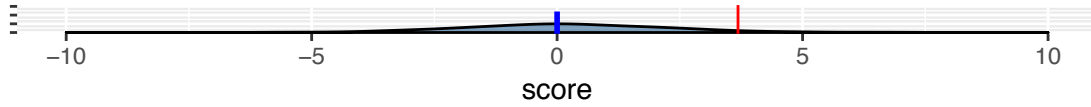

Docetaxel

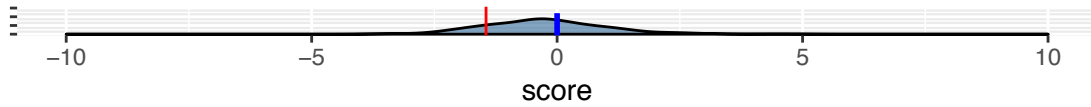

Doxorubicin

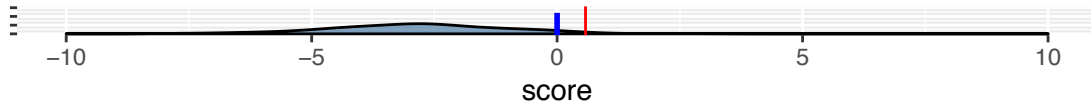

Cisplatin

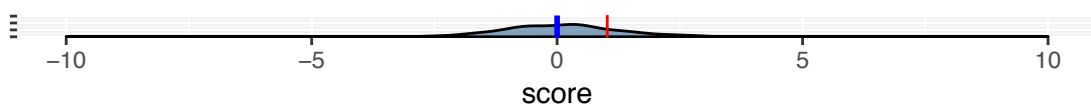

Gefitinib

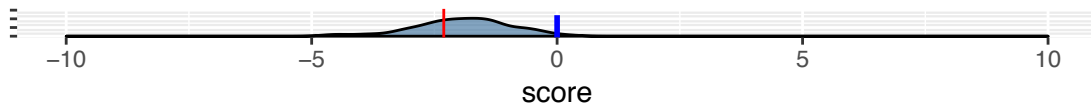

Gemcitabine

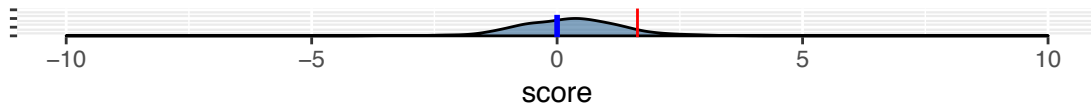

Topotecan

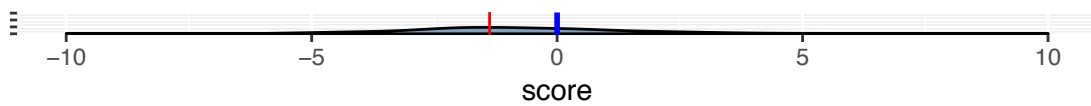

# Patient 1145

Carboplatin

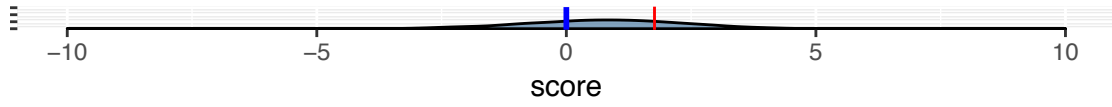

Paclitaxel

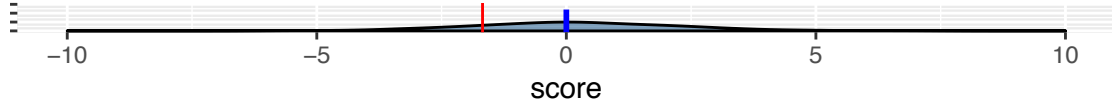

Docetaxel

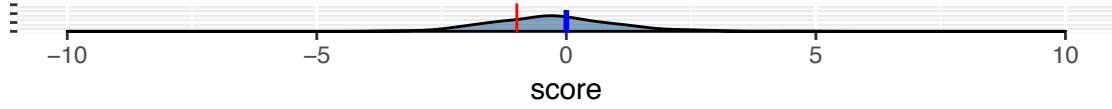

Doxorubicin

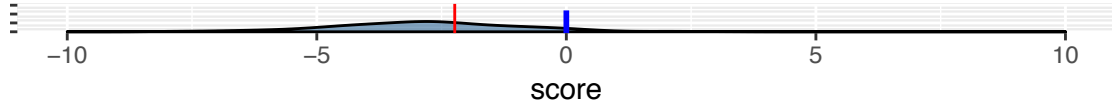

Cisplatin

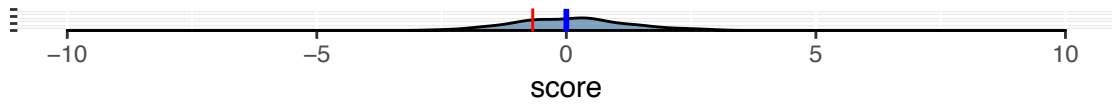

Gefitinib

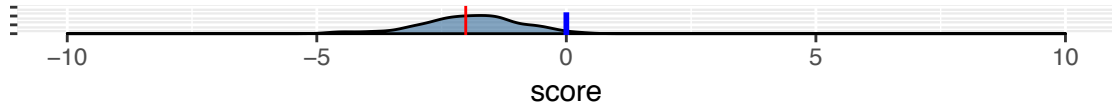

Gemcitabine

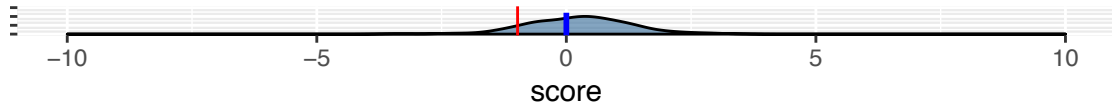

Topotecan

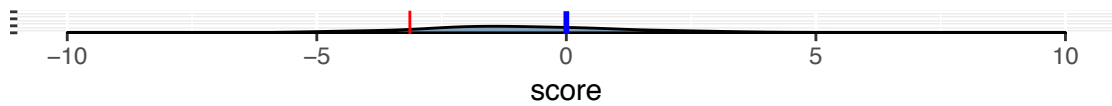

# Patient BJ1

Carboplatin

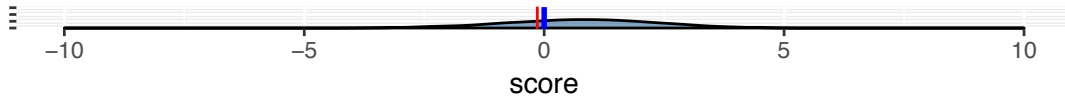

Paclitaxel

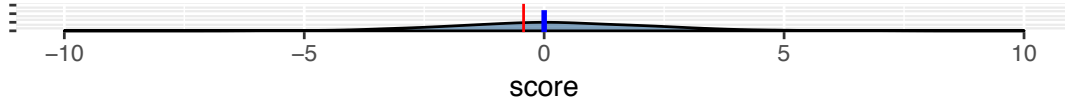

Docetaxel

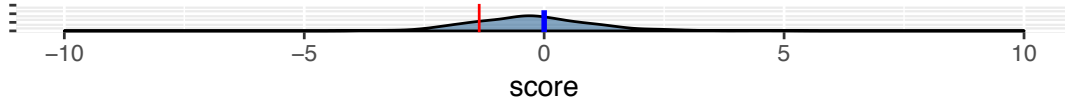

Doxorubicin

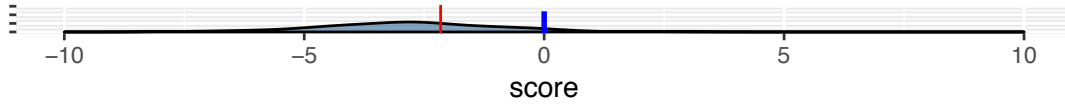

Cisplatin

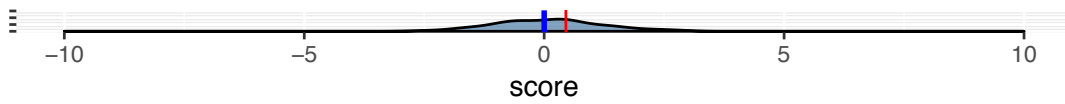

Gefitinib

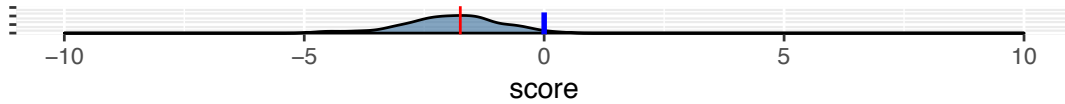

Gemcitabine

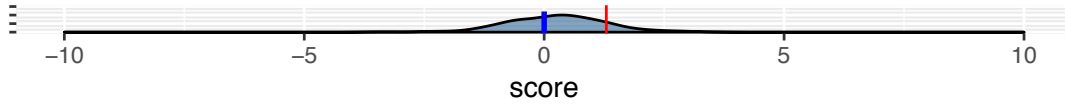

Topotecan

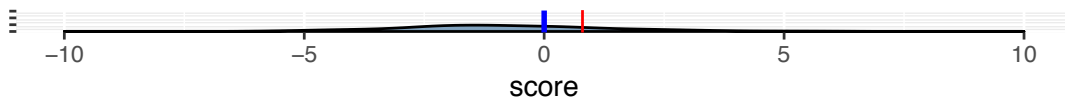

# Patient BJ4

Carboplatin

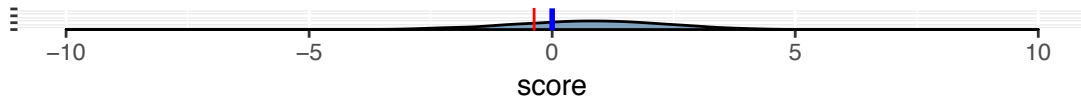

Paclitaxel

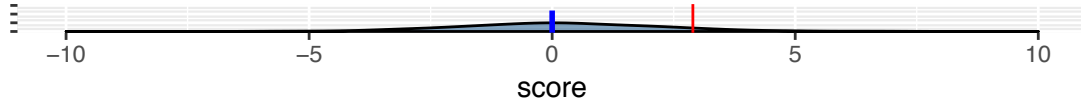

Docetaxel

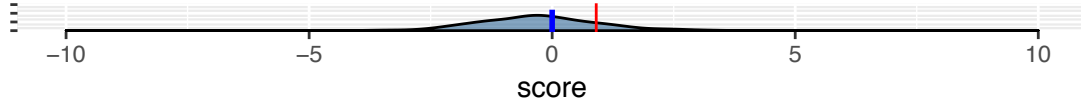

Doxorubicin

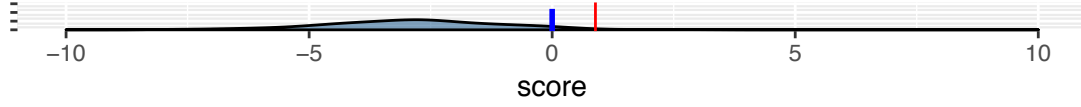

Cisplatin

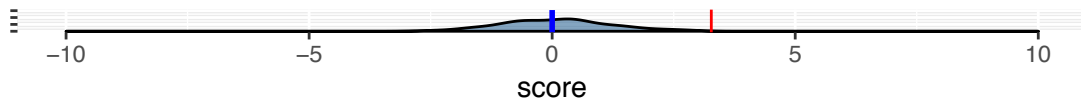

Gefitinib

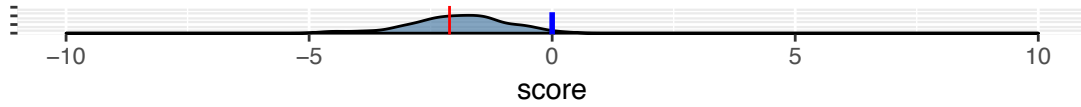

Gemcitabine

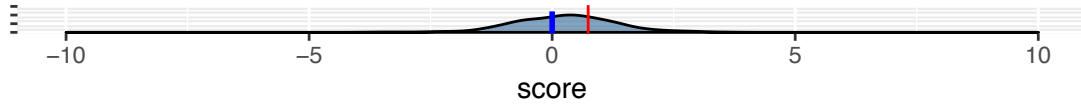

Topotecan

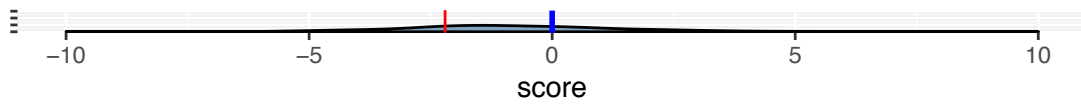



**Supplementary Fig. S2.** Patients are considered to be responsive to treatments if their respective CA-125 values dropped below normal values (<35; dashed blue line; dashed red line = day of surgery).

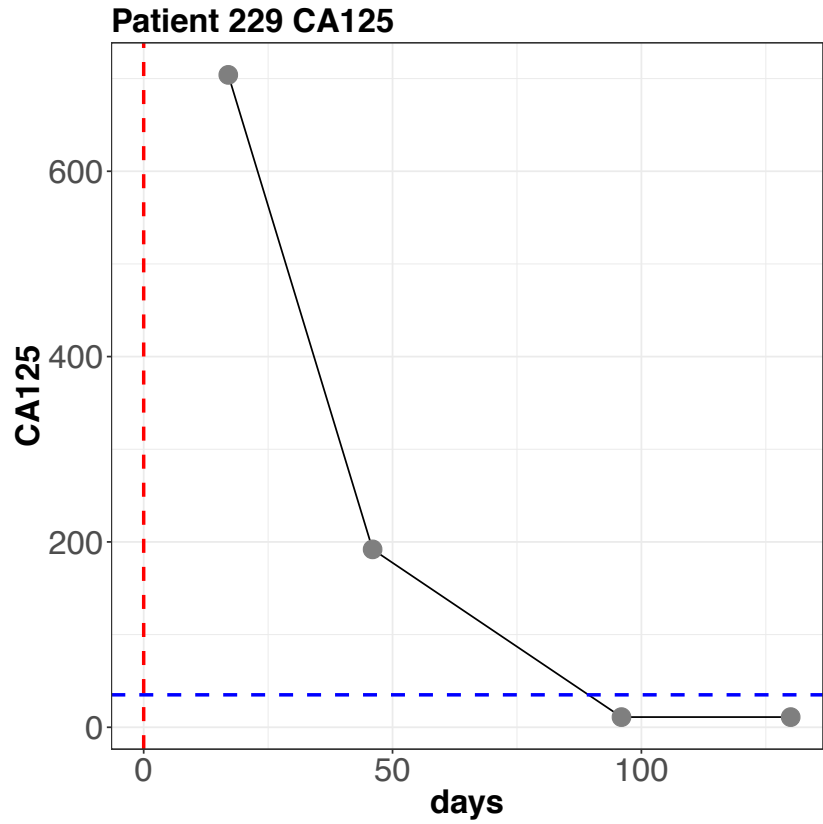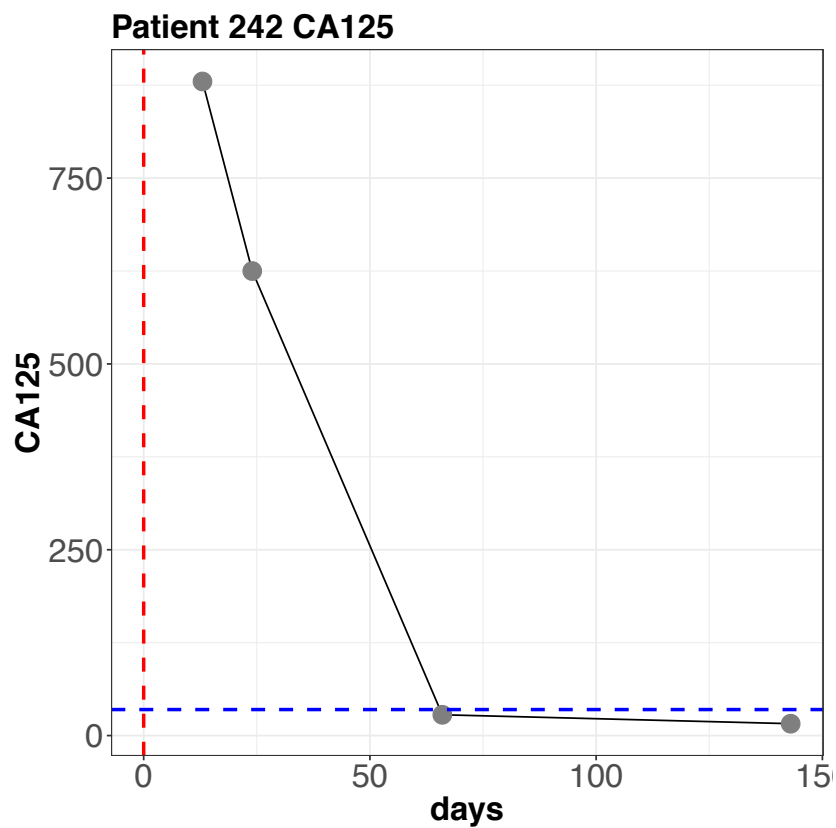

**Patient 272 CA125**

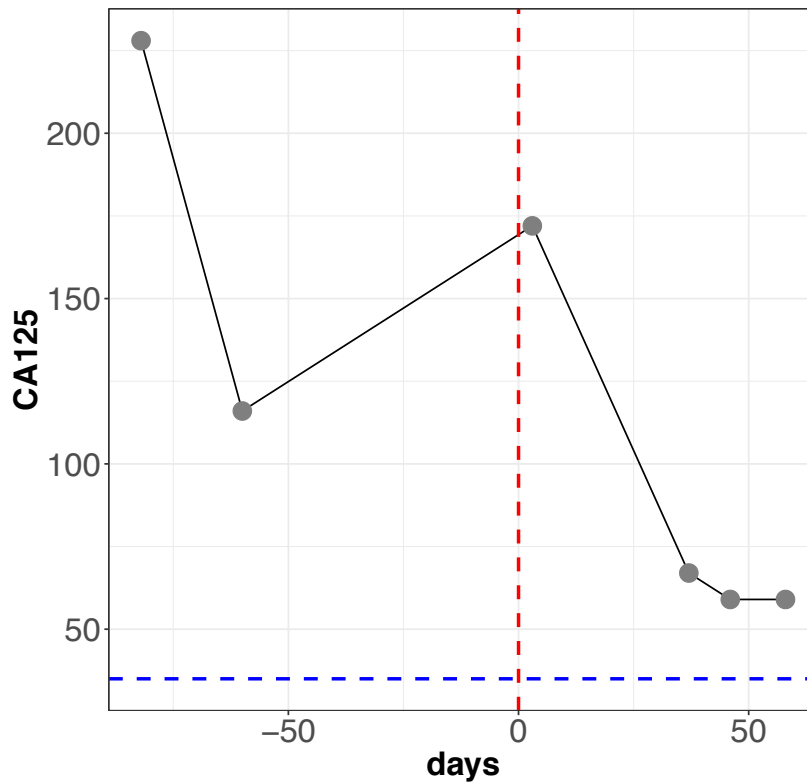

**Patient 286 CA125**

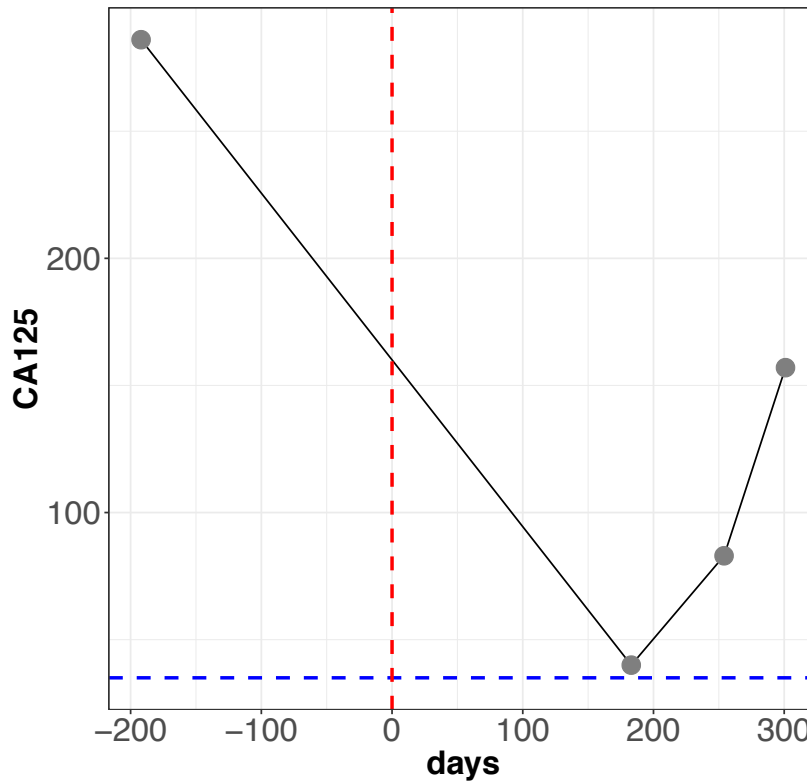

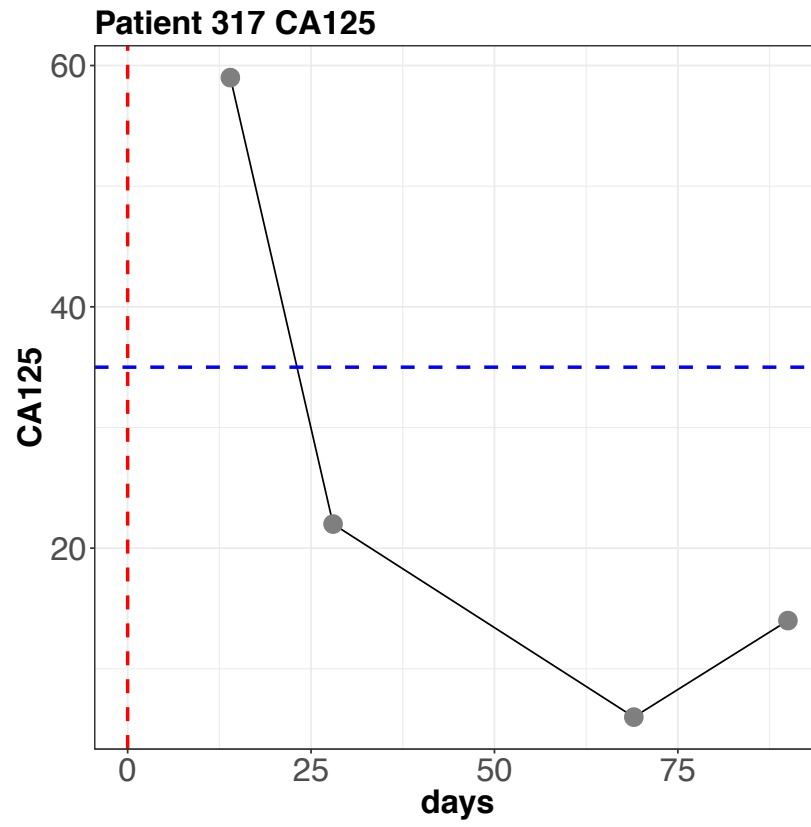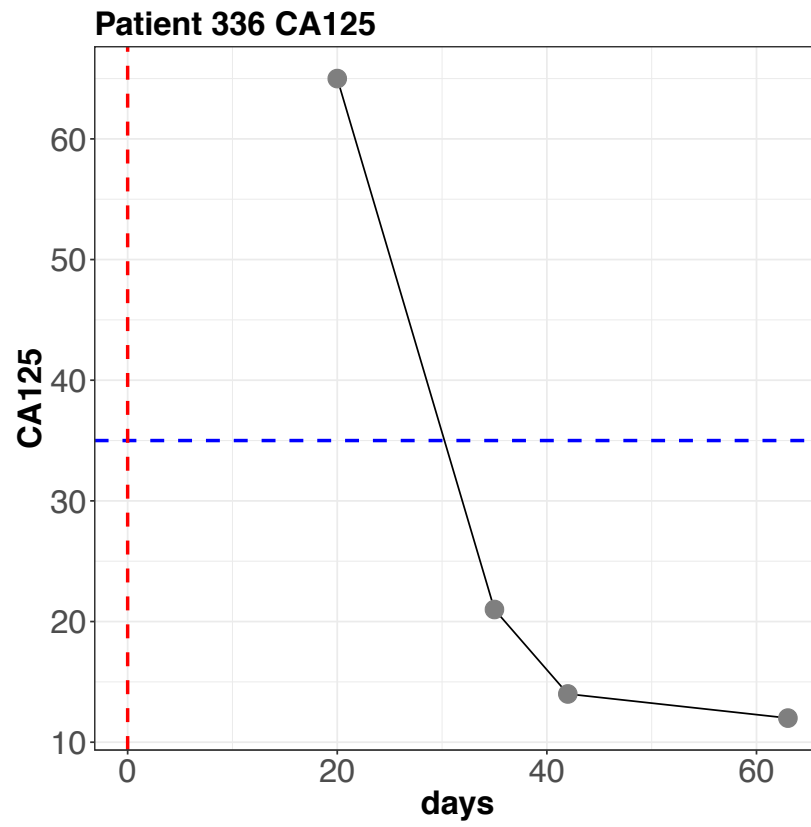

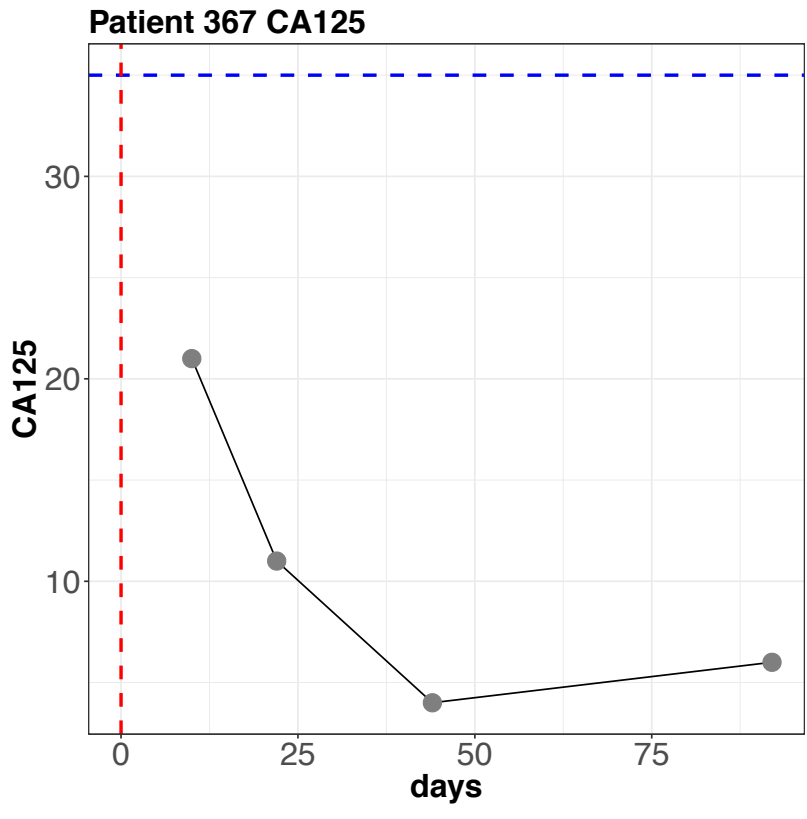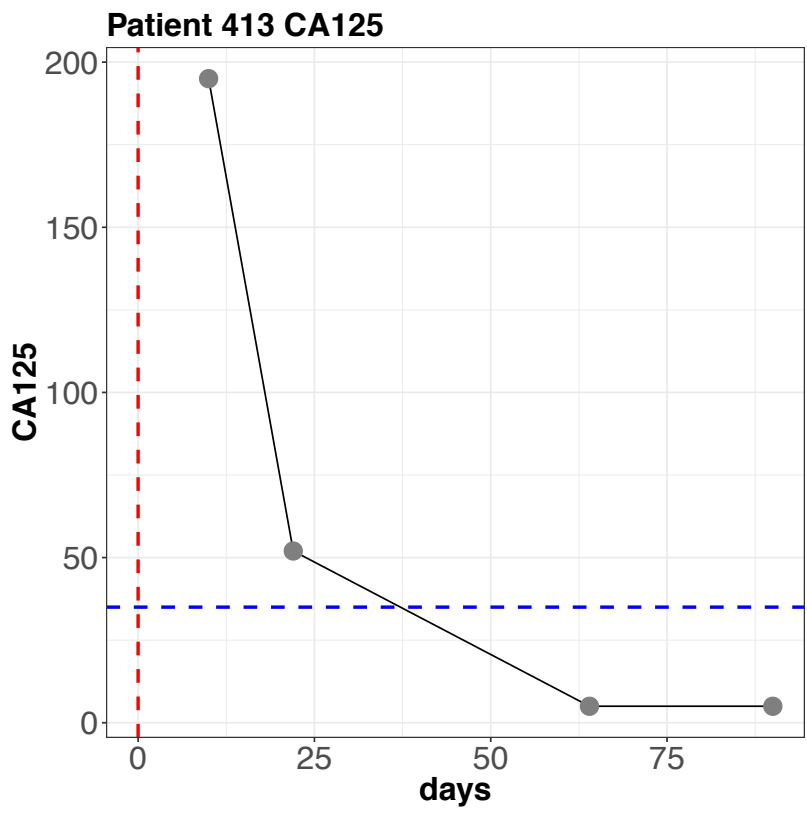

**Patient 489 CA125**

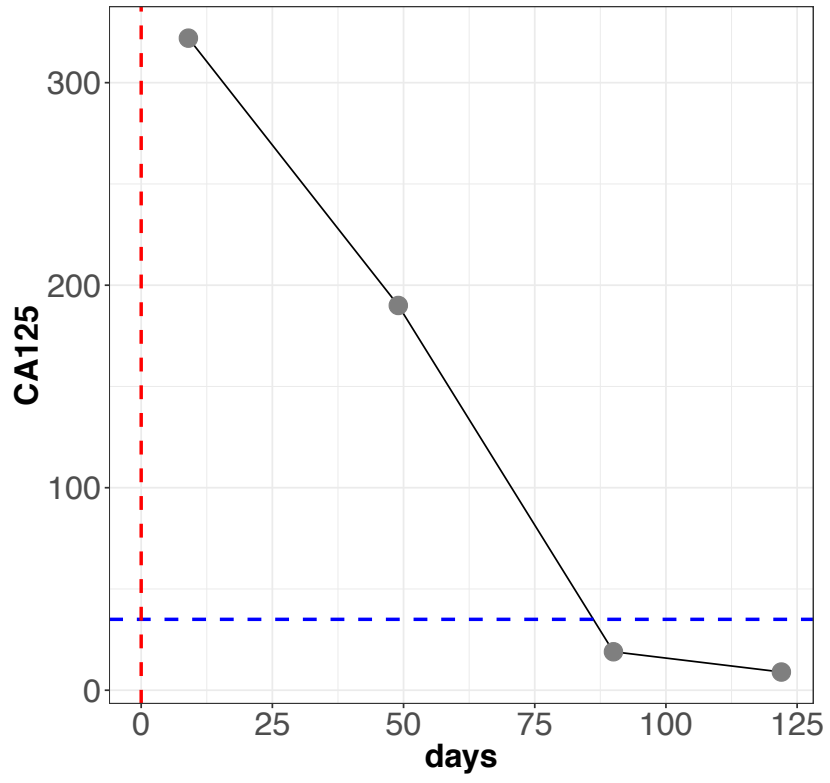

**Patient 528 CA125**

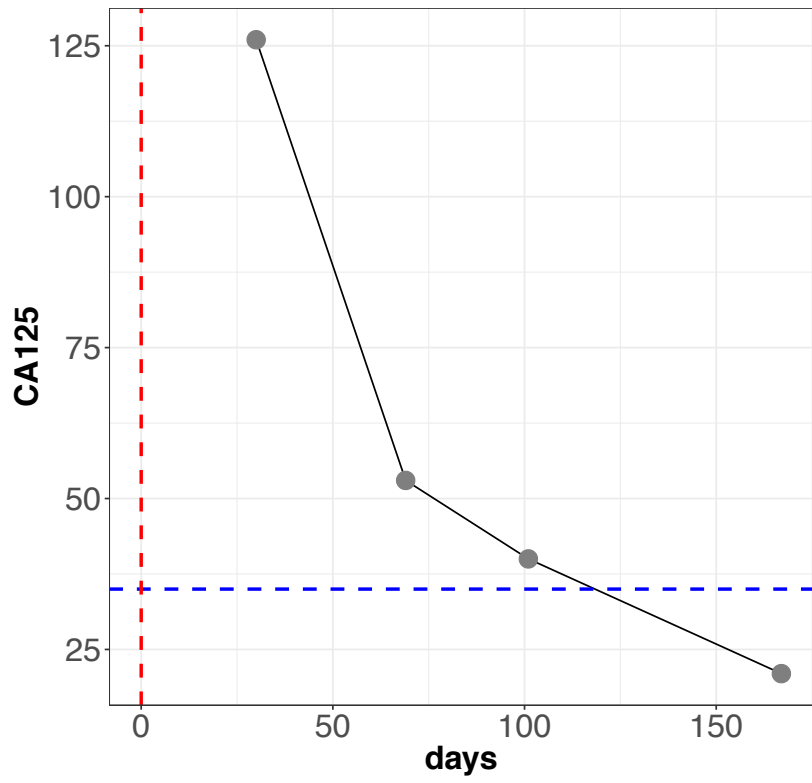

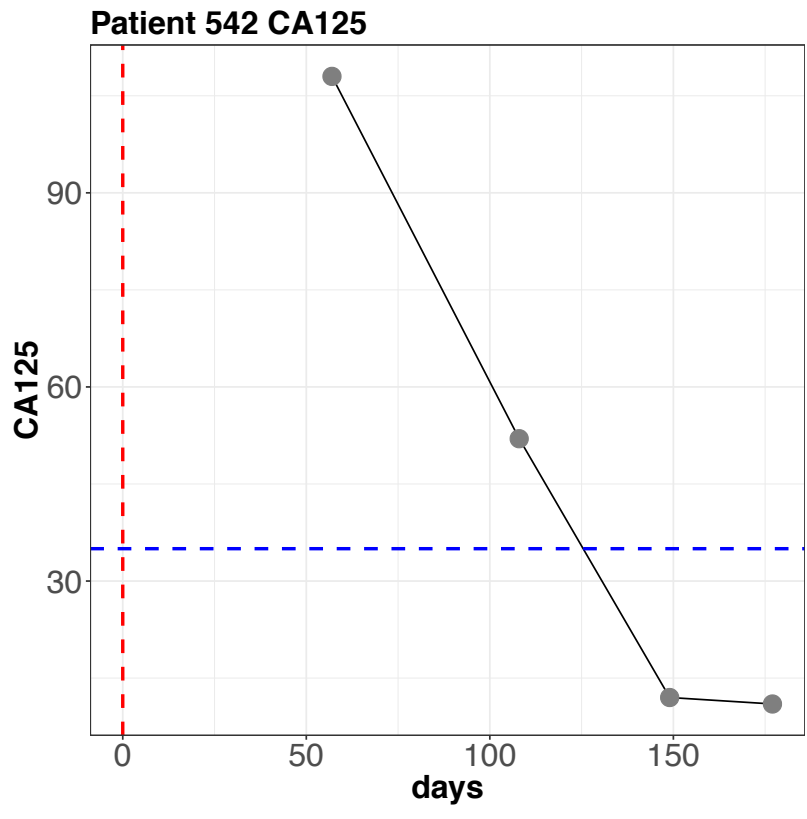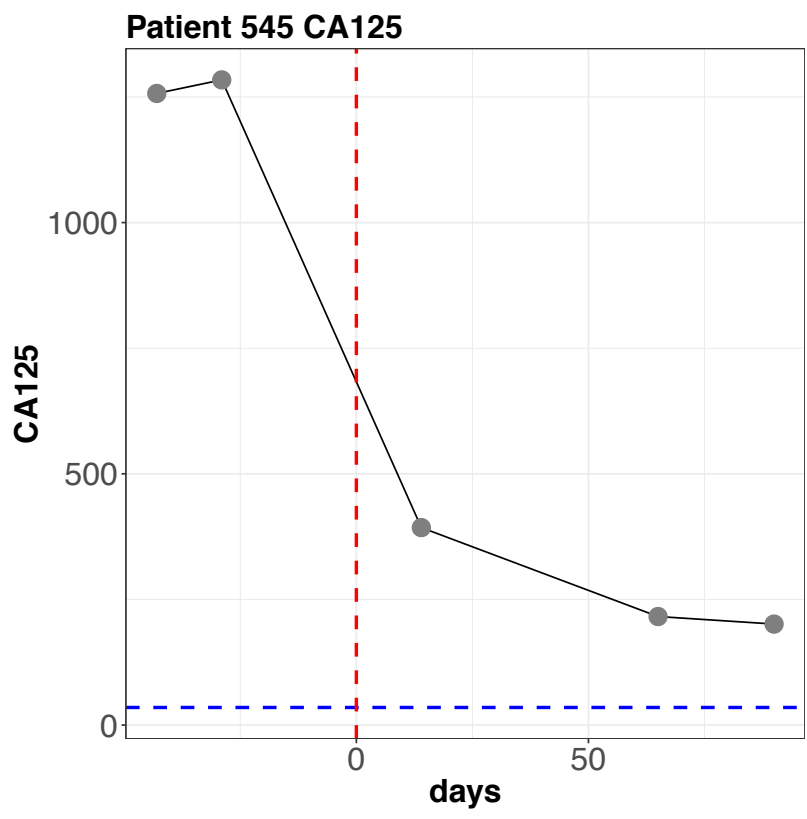

**Patient 588 CA125**

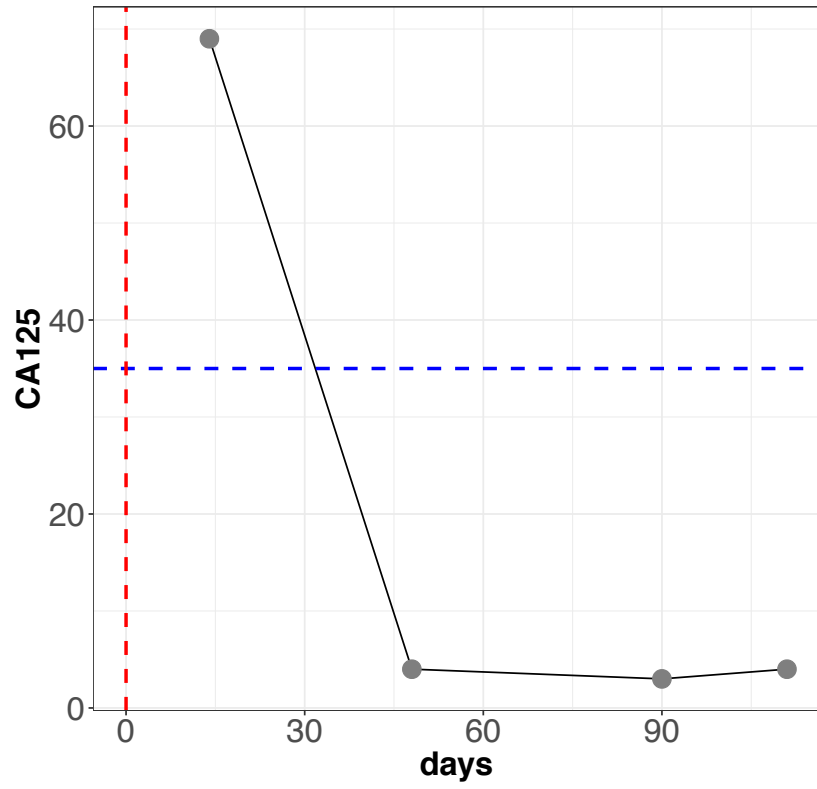

**Patient 617 CA125**

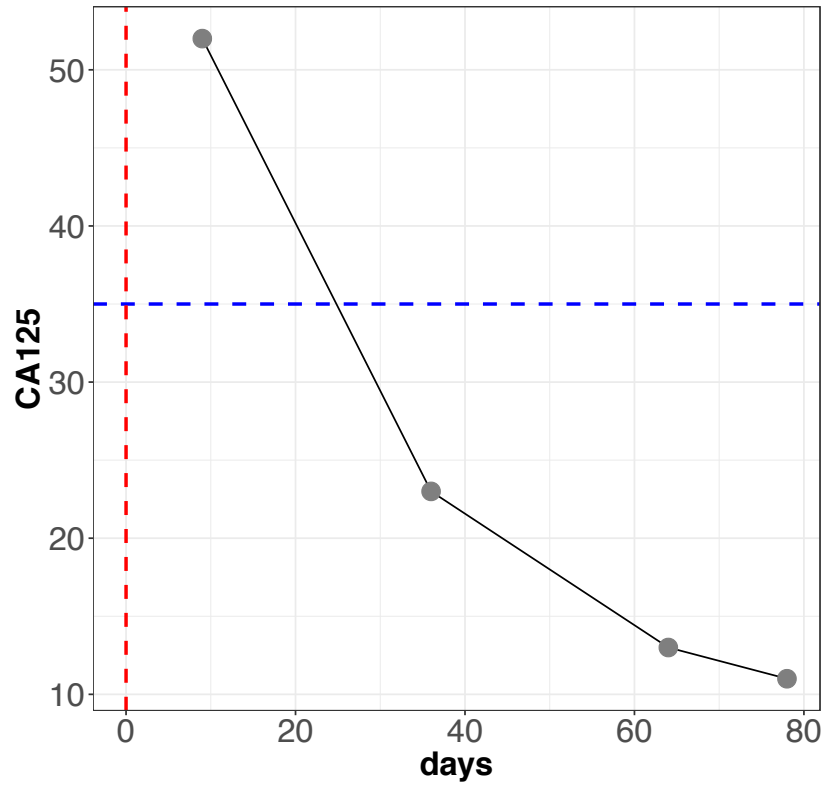

**Patient 620 CA125**

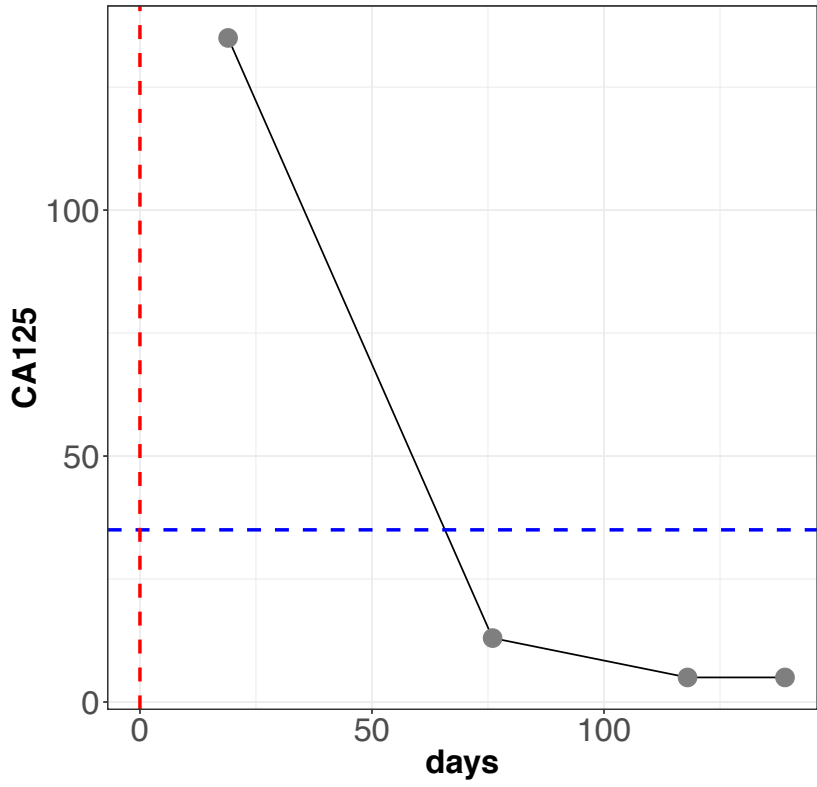

**Patient 813 CA125**

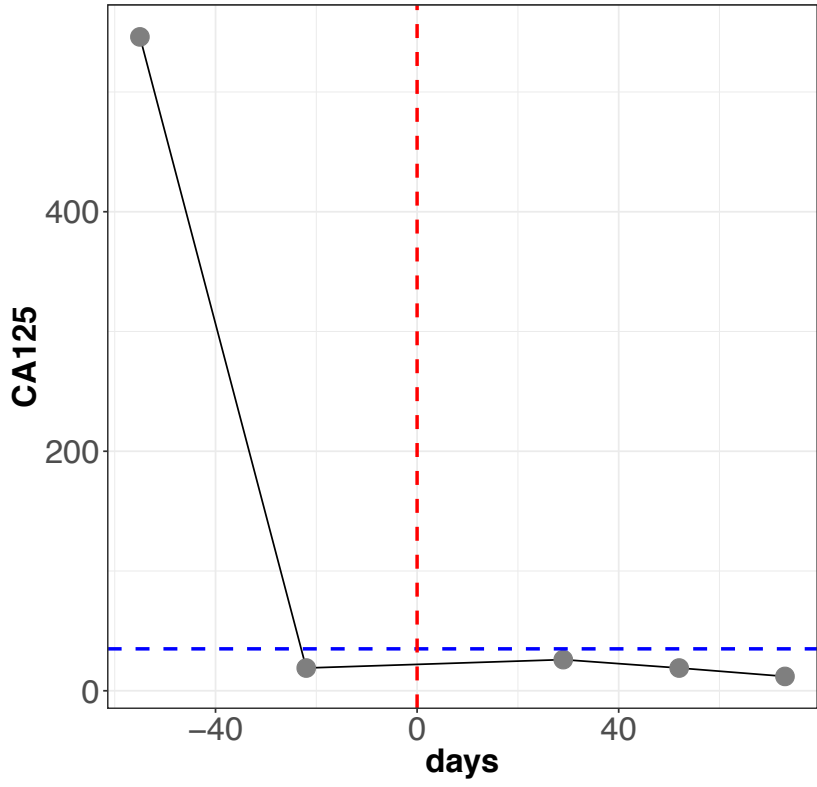



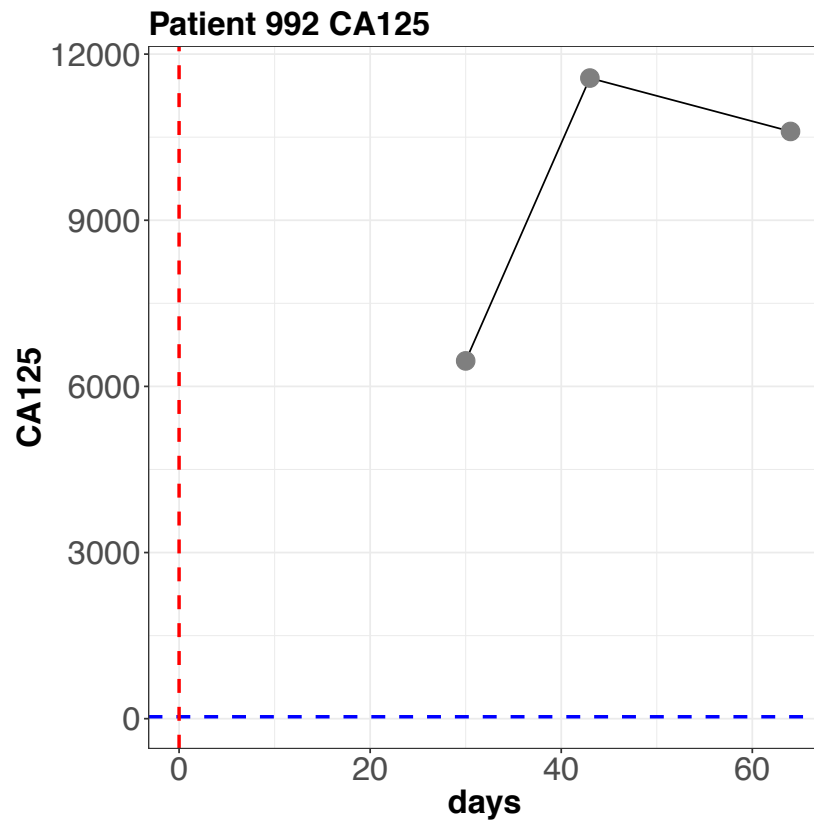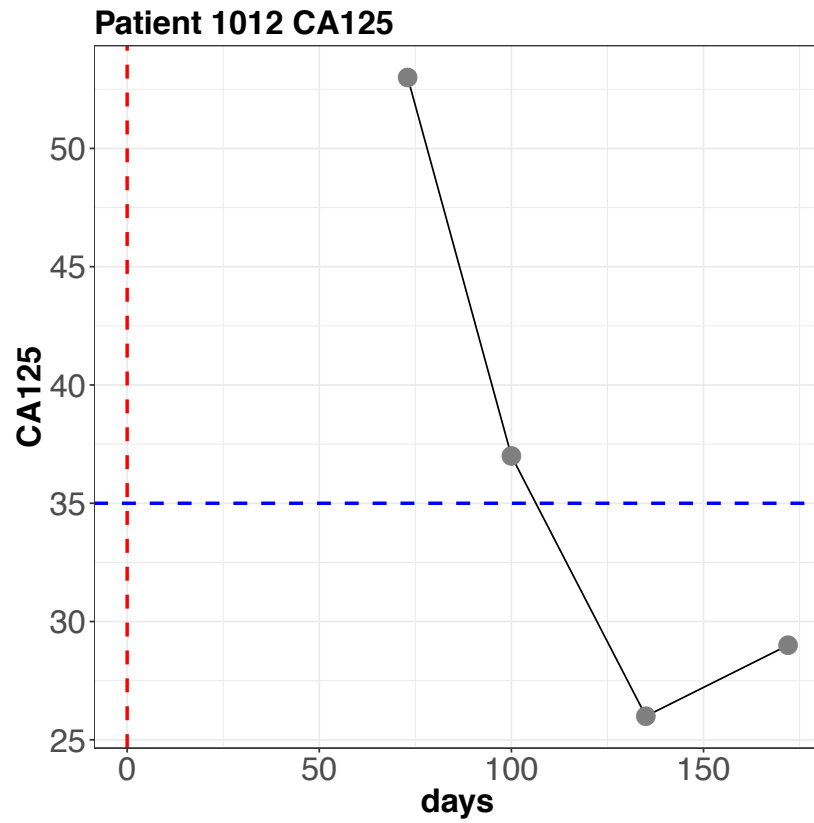

**Patient 1122 CA125**

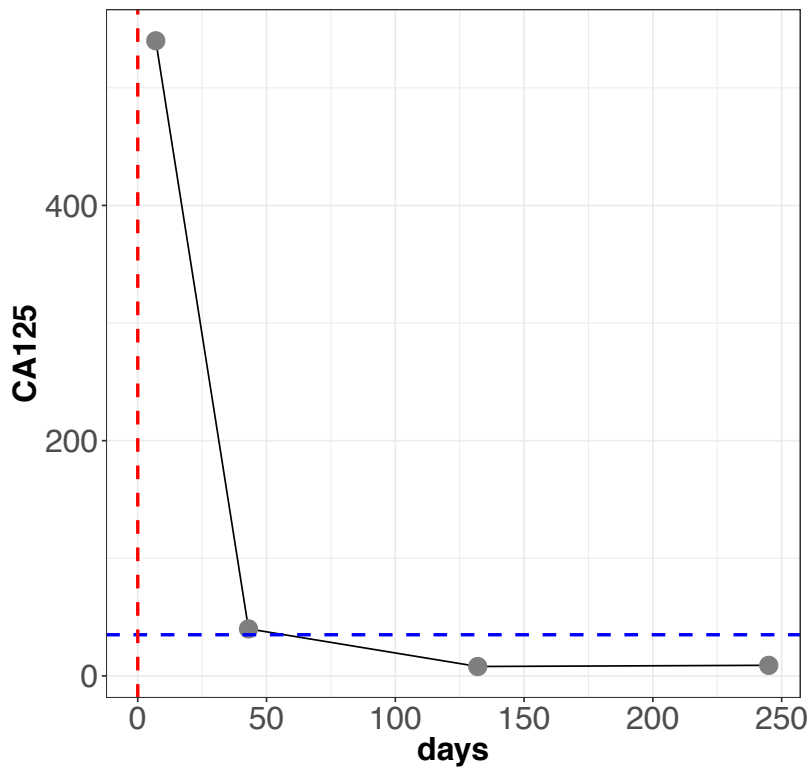

**Patient 1129 CA125**

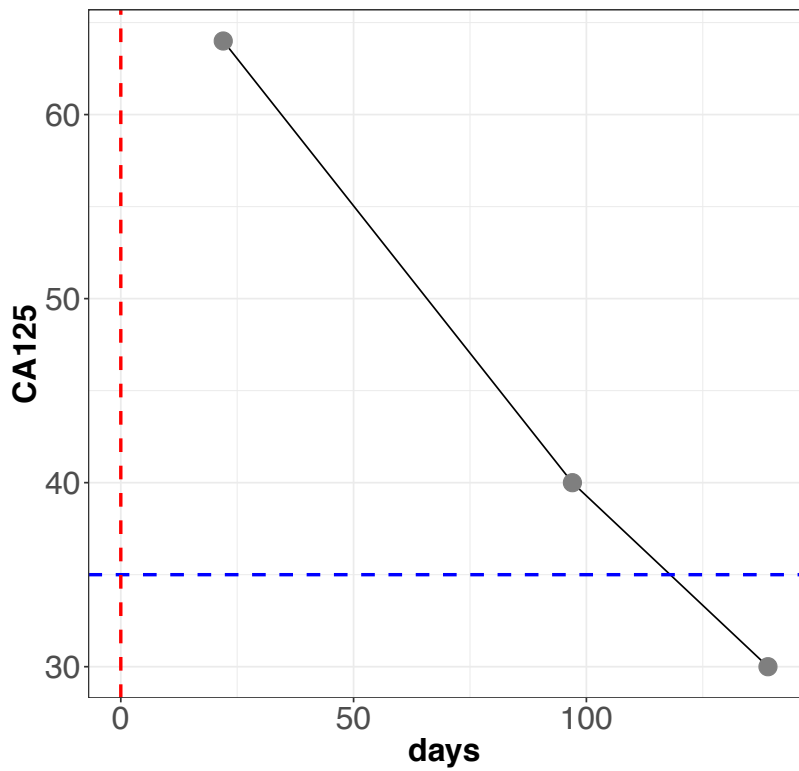

**Patient 1145 CA125**

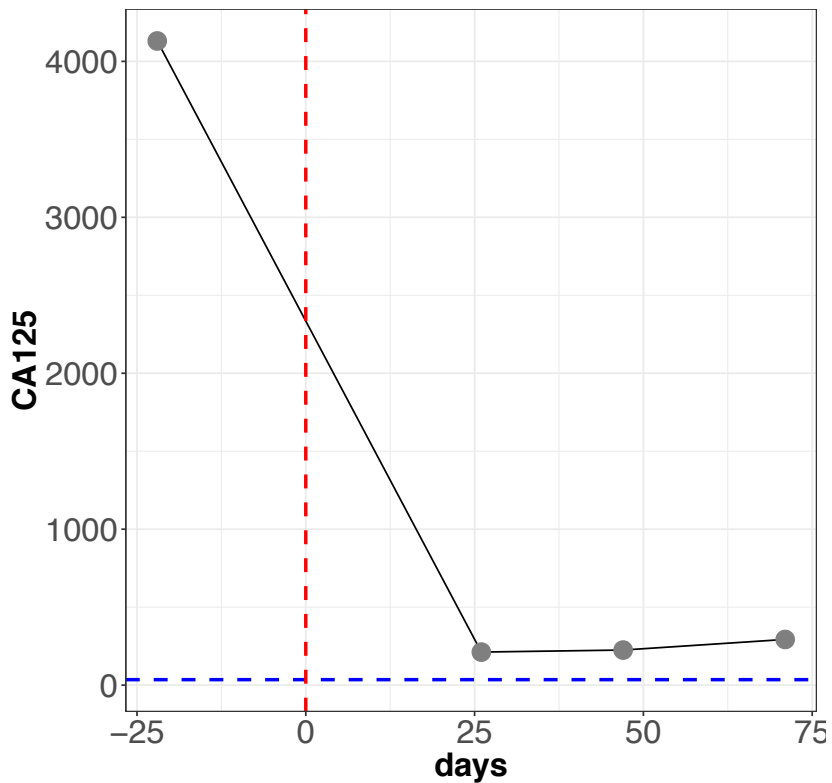

**Patient BJ1 CA125**

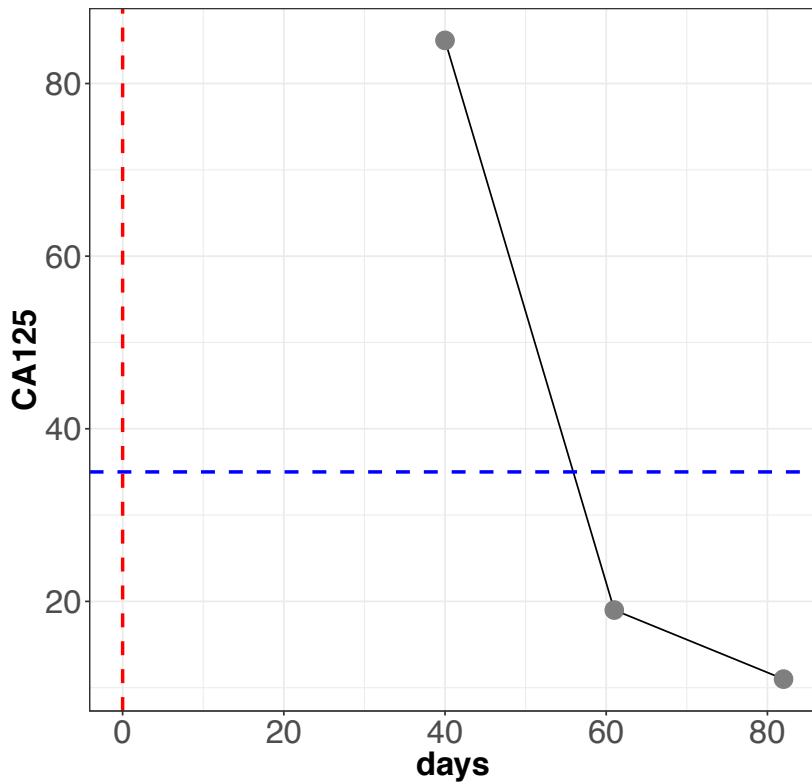

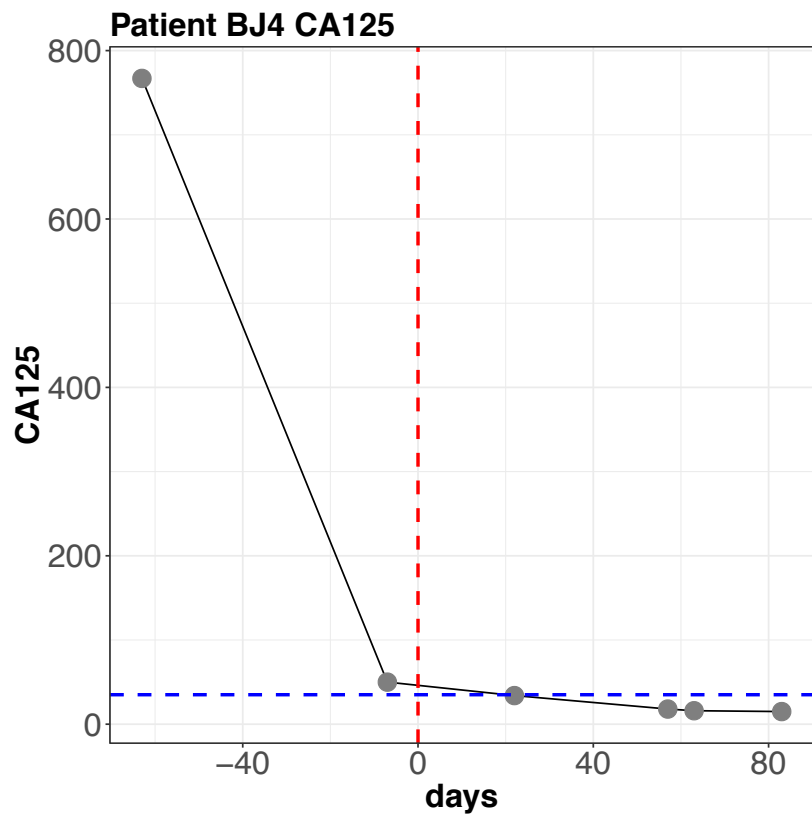

**Supplementary Table S1. Number and types of cancer patients responding to gemcitabine or 5-fluorouracil chemotherapeutic treatments.**

| Cancer Type                          | Drug                  | No. Responsive | No. Not Responsive | Total No. Samples |
|--------------------------------------|-----------------------|----------------|--------------------|-------------------|
| bladder urothelial carcinoma         | Gemcitabine           | 4              | 4                  | 8                 |
| breast invasive carcinoma            | Gemcitabine           | 1              | 1                  | 2                 |
| cervical squamous cell carcinoma     | Gemcitabine           | 1              | 0                  | 1                 |
| cholangiocarcinoma                   | Gemcitabine           | 3              | 1                  | 4                 |
| head/neck squamous cell carcinoma    | Gemcitabine           | 0              | 1                  | 1                 |
| liver hepatocellular carcinoma       | Gemcitabine           | 0              | 2                  | 2                 |
| lung adenocarcinoma                  | Gemcitabine           | 1              | 2                  | 3                 |
| lung squamous cell carcinoma         | Gemcitabine           | 1              | 2                  | 3                 |
| pancreatic adenocarcinoma            | Gemcitabine           | 24             | 33                 | 57                |
| pheochromocytoma/paraganglioma       | Gemcitabine           | 0              | 1                  | 1                 |
| sarcoma                              | Gemcitabine           | 1              | 5                  | 6                 |
| skin cutaneous melanoma              | Gemcitabine           | 0              | 2                  | 2                 |
| testicular germ cell tumors          | Gemcitabine           | 1              | 0                  | 1                 |
| uterine corpus endometrial carcinoma | Gemcitabine           | 0              | 1                  | 1                 |
| <b>Sub-total</b>                     | <b>Gemcitabine</b>    | <b>37</b>      | <b>55</b>          | <b>92</b>         |
| colon adenocarcinoma                 | 5-fluorouracil        | 2              | 2                  | 4                 |
| esophageal carcinoma                 | 5-fluorouracil        | 2              | 1                  | 3                 |
| pancreatic adenocarcinoma            | 5-fluorouracil        | 3              | 6                  | 9                 |
| rectal adenocarcinoma                | 5-fluorouracil        | 9              | 0                  | 9                 |
| stomach adenocarcinoma               | 5-fluorouracil        | 19             | 16                 | 35                |
| <b>Sub-total</b>                     | <b>5-fluorouracil</b> | <b>35</b>      | <b>25</b>          | <b>60</b>         |

**Supplementary Table S2. Predicted and observed responses of 60 cancer patients treated with 5-fluorouracil and 92 cancer patients treated with gemcitabine.**

(R = responder; NR = non-responder; TN = true negative; FP = false positive; TP = true positive; FN = false negative)

| Patient ID | Drug         | OBSERVED RESPONSE | PREDICTED RESPONSE |
|------------|--------------|-------------------|--------------------|
| F1         | Fluorouracil | NR                | NR(TN)             |
| F2         | Fluorouracil | NR                | NR(TN)             |
| F3         | Fluorouracil | NR                | NR(TN)             |
| F4         | Fluorouracil | NR                | R(FP)              |
| F5         | Fluorouracil | NR                | R(FP)              |
| F6         | Fluorouracil | NR                | NR(TN)             |
| F7         | Fluorouracil | NR                | NR(TN)             |
| F8         | Fluorouracil | NR                | NR(TN)             |
| F9         | Fluorouracil | NR                | NR(TN)             |
| F10        | Fluorouracil | NR                | NR(TN)             |
| F11        | Fluorouracil | NR                | NR(TN)             |

|     |              |    |        |
|-----|--------------|----|--------|
| F12 | Fluorouracil | NR | NR(TN) |
| F13 | Fluorouracil | NR | R(FP)  |
| F14 | Fluorouracil | NR | NR(TN) |
| F15 | Fluorouracil | NR | NR(TN) |
| F16 | Fluorouracil | NR | NR(TN) |
| F17 | Fluorouracil | NR | R(FP)  |
| F18 | Fluorouracil | NR | NR(TN) |
| F19 | Fluorouracil | NR | NR(TN) |
| F20 | Fluorouracil | NR | R(FP)  |
| F21 | Fluorouracil | NR | NR(TN) |
| F22 | Fluorouracil | NR | R(FP)  |
| F23 | Fluorouracil | NR | NR(TN) |
| F24 | Fluorouracil | NR | NR(TN) |
| F25 | Fluorouracil | NR | NR(TN) |
| F26 | Fluorouracil | R  | R(TP)  |
| F27 | Fluorouracil | R  | R(TP)  |
| F28 | Fluorouracil | R  | R(TP)  |
| F29 | Fluorouracil | R  | R(TP)  |
| F30 | Fluorouracil | R  | R(TP)  |
| F31 | Fluorouracil | R  | R(TP)  |
| F32 | Fluorouracil | R  | NR(FN) |
| F33 | Fluorouracil | R  | R(TP)  |
| F34 | Fluorouracil | R  | NR(FN) |
| F35 | Fluorouracil | R  | R(TP)  |
| F36 | Fluorouracil | R  | R(TP)  |
| F37 | Fluorouracil | R  | R(TP)  |
| F38 | Fluorouracil | R  | NR(FN) |
| F39 | Fluorouracil | R  | R(TP)  |
| F40 | Fluorouracil | R  | R(TP)  |
| F41 | Fluorouracil | R  | R(TP)  |
| F42 | Fluorouracil | R  | R(TP)  |
| F43 | Fluorouracil | R  | R(TP)  |
| F44 | Fluorouracil | R  | R(TP)  |
| F45 | Fluorouracil | R  | R(TP)  |
| F46 | Fluorouracil | R  | R(TP)  |
| F47 | Fluorouracil | R  | R(TP)  |
| F48 | Fluorouracil | R  | R(TP)  |
| F49 | Fluorouracil | R  | R(TP)  |
| F50 | Fluorouracil | R  | R(TP)  |
| F51 | Fluorouracil | R  | R(TP)  |
| F52 | Fluorouracil | R  | NR(FN) |
| F53 | Fluorouracil | R  | R(TP)  |
| F54 | Fluorouracil | R  | R(TP)  |

|         |              |   |                   |
|---------|--------------|---|-------------------|
| F55     | Fluorouracil | R | NR(FN)            |
| F56     | Fluorouracil | R | R(TP)             |
| F57     | Fluorouracil | R | R(TP)             |
| F58     | Fluorouracil | R | R(TP)             |
| F59     | Fluorouracil | R | R(TP)             |
| F60     | Fluorouracil | R | R(TP)             |
| Totals: |              |   | 30TP,19TN,6FP,5FN |

| Patient ID | Drug        | OBSERVED RESPONSE | PREDICTED RESPONSE |
|------------|-------------|-------------------|--------------------|
| G1         | Gemcitabine | NR                | NR(TN)             |
| G2         | Gemcitabine | NR                | NR(TN)             |
| G3         | Gemcitabine | NR                | NR(TN)             |
| G4         | Gemcitabine | NR                | R(FP)              |
| G5         | Gemcitabine | NR                | NR(TN)             |
| G6         | Gemcitabine | NR                | R(FP)              |
| G7         | Gemcitabine | NR                | NR(TN)             |
| G8         | Gemcitabine | NR                | NR(TN)             |
| G9         | Gemcitabine | NR                | NR(TN)             |
| G10        | Gemcitabine | NR                | NR(TN)             |
| G11        | Gemcitabine | NR                | NR(TN)             |
| G12        | Gemcitabine | NR                | NR(TN)             |
| G13        | Gemcitabine | NR                | R(FP)              |
| G14        | Gemcitabine | NR                | NR(TN)             |
| G15        | Gemcitabine | NR                | NR(TN)             |
| G16        | Gemcitabine | NR                | NR(TN)             |
| G17        | Gemcitabine | NR                | NR(TN)             |
| G18        | Gemcitabine | NR                | R(FP)              |
| G19        | Gemcitabine | NR                | NR(TN)             |
| G20        | Gemcitabine | NR                | NR(TN)             |
| G21        | Gemcitabine | NR                | NR(TN)             |
| G22        | Gemcitabine | NR                | R(FP)              |
| G23        | Gemcitabine | NR                | NR(TN)             |
| G24        | Gemcitabine | NR                | NR(TN)             |
| G25        | Gemcitabine | NR                | NR(TN)             |
| G26        | Gemcitabine | NR                | NR(TN)             |
| G27        | Gemcitabine | NR                | NR(TN)             |
| G28        | Gemcitabine | NR                | R(FP)              |
| G29        | Gemcitabine | NR                | NR(TN)             |
| G30        | Gemcitabine | NR                | NR(TN)             |
| G31        | Gemcitabine | NR                | NR(TN)             |
| G32        | Gemcitabine | NR                | NR(TN)             |
| G33        | Gemcitabine | NR                | NR(TN)             |

|     |             |    |        |
|-----|-------------|----|--------|
| G34 | Gemcitabine | NR | NR(TN) |
| G35 | Gemcitabine | NR | NR(TN) |
| G36 | Gemcitabine | NR | NR(TN) |
| G37 | Gemcitabine | NR | NR(TN) |
| G38 | Gemcitabine | NR | R(FP)  |
| G39 | Gemcitabine | NR | NR(TN) |
| G40 | Gemcitabine | NR | NR(TN) |
| G41 | Gemcitabine | NR | NR(TN) |
| G42 | Gemcitabine | NR | NR(TN) |
| G43 | Gemcitabine | NR | NR(TN) |
| G44 | Gemcitabine | NR | R(FP)  |
| G45 | Gemcitabine | NR | NR(TN) |
| G46 | Gemcitabine | NR | NR(TN) |
| G47 | Gemcitabine | NR | NR(TN) |
| G48 | Gemcitabine | NR | NR(TN) |
| G49 | Gemcitabine | NR | NR(TN) |
| G50 | Gemcitabine | NR | NR(TN) |
| G51 | Gemcitabine | NR | NR(TN) |
| G52 | Gemcitabine | NR | NR(TN) |
| G53 | Gemcitabine | NR | NR(TN) |
| G54 | Gemcitabine | NR | NR(TN) |
| G55 | Gemcitabine | NR | NR(TN) |
| G56 | Gemcitabine | R  | R(TP)  |
| G57 | Gemcitabine | R  | NR(FN) |
| G58 | Gemcitabine | R  | R(TP)  |
| G59 | Gemcitabine | R  | R(TP)  |
| G60 | Gemcitabine | R  | R(TP)  |
| G61 | Gemcitabine | R  | R(TP)  |
| G62 | Gemcitabine | R  | R(TP)  |
| G63 | Gemcitabine | R  | NR(FN) |
| G64 | Gemcitabine | R  | R(TP)  |
| G65 | Gemcitabine | R  | R(TP)  |
| G66 | Gemcitabine | R  | R(TP)  |
| G67 | Gemcitabine | R  | R(TP)  |
| G68 | Gemcitabine | R  | R(TP)  |
| G69 | Gemcitabine | R  | R(TP)  |
| G70 | Gemcitabine | R  | R(TP)  |
| G71 | Gemcitabine | R  | R(TP)  |
| G72 | Gemcitabine | R  | R(TP)  |
| G73 | Gemcitabine | R  | R(TP)  |
| G74 | Gemcitabine | R  | R(TP)  |
| G75 | Gemcitabine | R  | R(TP)  |
| G76 | Gemcitabine | R  | NR(FN) |



|         |             |   |                   |
|---------|-------------|---|-------------------|
| G77     | Gemcitabine | R | R(TP)             |
| G78     | Gemcitabine | R | R(TP)             |
| G79     | Gemcitabine | R | R(TP)             |
| G80     | Gemcitabine | R | NR(FN)            |
| G81     | Gemcitabine | R | NR(FN)            |
| G82     | Gemcitabine | R | R(TP)             |
| G83     | Gemcitabine | R | R(TP)             |
| G84     | Gemcitabine | R | R(TP)             |
| G85     | Gemcitabine | R | R(TP)             |
| G86     | Gemcitabine | R | R(TP)             |
| G87     | Gemcitabine | R | NR(FN)            |
| G88     | Gemcitabine | R | NR(FN)            |
| G89     | Gemcitabine | R | R(TP)             |
| G90     | Gemcitabine | R | NR(FN)            |
| G91     | Gemcitabine | R | NR(FN)            |
| G92     | Gemcitabine | R | R(TP)             |
| Totals: |             |   | 28TP,47TN,8FP,9FN |

For Supplementary Table S3 see additional data file (xlsx).

**Supplementary Table S4. Genes associated with optimal predictive accuracy for gemcitabine (81 genes) and 5-fluorouracil (31 genes).**

**5-Fluorouracil**

| ensembl_gene_id     | hgnc_gene symbol           |
|---------------------|----------------------------|
| ENSG00000003096.12  | KLHL13                     |
| ENSG000000086848.13 | ALG9                       |
| ENSG00000117475.12  | BLZF1                      |
| ENSG00000120029.11  | C10orf76                   |
| ENSG00000120549.14  | KIAA1217                   |
| ENSG00000135951.13  | TSGA10                     |
| ENSG00000173338.11  | KCNK7                      |
| ENSG00000178074.5   | C2orf69                    |
| ENSG00000182950.2   | ODF3L1                     |
| ENSG00000196083.8   | IL1RAP                     |
| ENSG00000207698.1   | MIR32                      |
| ENSG00000207895.1   | PPIAP29                    |
| ENSG00000214975.4   | not functionally annotated |
| ENSG00000227680.1   | not functionally annotated |
| ENSG00000228031.2   | not functionally annotated |
| ENSG00000230269.5   | not functionally annotated |
| ENSG00000232813.1   | TMEM92-AS1                 |
| ENSG00000236360.2   | RNU6-1231P                 |
| ENSG00000251179.1   | not functionally annotated |

|                   |                            |
|-------------------|----------------------------|
| ENSG00000252994.1 | not functionally annotated |
| ENSG00000254850.2 | not functionally annotated |
| ENSG00000257264.3 | HMGB3P32                   |
| ENSG00000260671.2 | not functionally annotated |
| ENSG00000260828.1 | not functionally annotated |
| ENSG00000260920.2 | not functionally annotated |
| ENSG00000266176.1 | not functionally annotated |
| ENSG00000266821.1 | not functionally annotated |
| ENSG00000267633.1 | not functionally annotated |
| ENSG00000271394.1 | not functionally annotated |
| ENSG00000279075.1 | not functionally annotated |
| ENSG00000279144.1 | not functionally annotated |

### Gemcitabine

| <b>ensembl_gene_id.</b> | <b>hgnc_gene symbol</b>    |
|-------------------------|----------------------------|
| ENSG00000085265.9       | FCN1                       |
| ENSG00000101935.8       | AMMECR1                    |
| ENSG00000106123.10      | EPHB6                      |
| ENSG00000111863.11      | ADTRP                      |
| ENSG00000113739.9       | STC2                       |
| ENSG00000131355.13      | ADGRE3                     |
| ENSG00000131473.15      | ACLY                       |
| ENSG00000136960.11      | ENPP2                      |
| ENSG00000138134.10      | STAMBPL1                   |
| ENSG00000139351.13      | SYCP3                      |
| ENSG00000146109.4       | ABT1                       |
| ENSG00000147571.4       | CRH                        |
| ENSG00000160223.15      | ICOSLG                     |
| ENSG00000165102.13      | HGSNAT                     |
| ENSG00000165682.13      | CLEC1B                     |
| ENSG00000170703.14      | TTLL6                      |
| ENSG00000172900.10      | not functionally annotated |
| ENSG00000173389.14      | IQCF1                      |
| ENSG00000180720.7       | CHRM4                      |
| ENSG00000181374.6       | CCL13                      |
| ENSG00000183019.6       | MCEMP1                     |
| ENSG00000185220.10      | PGBD2                      |
| ENSG00000187616.4       | MYMK                       |
| ENSG00000188477.11      | LYPD2                      |
| ENSG00000197353.3       | ELANE                      |
| ENSG00000197561.5       | COL4A6                     |
| ENSG00000197565.14      | HOXA4                      |
| ENSG00000197576.12      | not functionally annotated |
| ENSG00000200591.1       | RNY4P17                    |

|                   |                            |
|-------------------|----------------------------|
| ENSG00000201818.1 | not functionally annotated |
| ENSG00000202279.1 | SNORA70B                   |
| ENSG00000206937.1 | RNU6-790P                  |
| ENSG00000207208.1 | KLHL23                     |
| ENSG00000213160.8 | SELENOWP1                  |
| ENSG00000215900.4 | RNU6-584P                  |
| ENSG00000222282.1 | SNORA79B                   |
| ENSG00000222489.1 | not functionally annotated |
| ENSG00000223343.1 | HMGB1P9                    |
| ENSG00000224159.1 | SLC9A3-AS1                 |
| ENSG00000225138.6 | not functionally annotated |
| ENSG00000225744.1 | not functionally annotated |
| ENSG00000228157.4 | AMD1P1                     |
| ENSG00000228339.1 | KHSRPP1                    |
| ENSG00000229835.2 | not functionally annotated |
| ENSG00000230534.5 | not functionally annotated |
| ENSG00000232615.4 | not functionally annotated |
| ENSG00000233514.1 | not functionally annotated |
| ENSG00000239455.1 | PPIL3                      |
| ENSG00000240344.7 | RN7SL809P                  |
| ENSG00000241217.3 | GAPDHP47                   |
| ENSG00000241781.2 | GUCY2GP                    |
| ENSG00000243033.2 | not functionally annotated |
| ENSG00000243316.5 | RN7SL762P                  |
| ENSG00000243961.2 | SNRPCP3                    |
| ENSG00000244308.2 | RN7SKP197                  |
| ENSG00000244668.1 | IGLVI-70                   |
| ENSG00000252886.1 | IGLV3-30                   |
| ENSG00000253239.1 | not functionally annotated |
| ENSG00000253329.1 | IGHV1-17                   |
| ENSG00000253475.1 | HSPD1P2                    |
| ENSG00000254046.1 | not functionally annotated |
| ENSG00000254543.1 | not functionally annotated |
| ENSG00000256533.1 | not functionally annotated |
| ENSG00000256948.1 | LINC01169                  |
| ENSG00000258520.1 | not functionally annotated |
| ENSG00000259471.1 | not functionally annotated |
| ENSG00000259871.1 | COX6CP1                    |
| ENSG00000259931.2 | not functionally annotated |
| ENSG00000260318.1 | not functionally annotated |
| ENSG00000260776.4 | TXNIP                      |
| ENSG00000261212.1 | not functionally annotated |
| ENSG00000265212.2 | not functionally annotated |
| ENSG00000265972.4 | not functionally annotated |

|                   |                            |
|-------------------|----------------------------|
| ENSG00000266924.1 | LINC01081                  |
| ENSG00000267293.1 | not functionally annotated |
| ENSG00000268036.1 | YWHAQP7                    |
| ENSG00000268754.1 | not functionally annotated |
| ENSG00000269495.1 | not functionally annotated |
| ENSG00000271142.1 | not functionally annotated |
| ENSG00000274979.1 | not functionally annotated |
| ENSG00000278532.1 | not functionally annotated |

**Supplementary Table S5. Clinical stage, grade and type of 23 ovarian cancer patient tumors included in this study.**

| Patient ID | age at time of surgery | histopathology of tumor | stage  | grade |
|------------|------------------------|-------------------------|--------|-------|
| 229        | 58                     | serous papillary        | IIIc   | 3     |
| 242        | 63                     | serous papillary        | IIIb   | 3     |
| 272        | 83                     | adenocarcinoma          | IIIb   | 2/3   |
| 286        | 52                     | serous papillary        | IIIc   | 2/3   |
| 317        | 59                     | serous papillary        | Ic     | 3     |
| 336        | 63                     | serous papillary        | Ic     | 3     |
| 367        | 56                     | serous papillary        | II     | 3     |
| 413        | 49                     | serous papillary        | IIb    | 3     |
| 489        | 48                     | serous papillary        | IV     | 3     |
| 528        | 66                     | serous papillary        | IIIc   | 3     |
| 542        | 61                     | serous papillary        | IV     | 3     |
| 545        | 74                     | MMMT                    | IIIc   | 3     |
| 588        | 71                     | serous papillary        | IIIc   | 2/3   |
| 617        | 64                     | serous papillary        | IIIc   | 2/3   |
| 620        | 62                     | serous papillary        | III/IV | 3     |
| 813        | 56                     | adenocarcinoma          | III    | 1/2   |
| 992        | 73                     | serous papillary        | IIIc   | 3     |
| 1012       | 75                     | serous papillary        | IIIc   | 3     |
| 1122       | 65                     | serous papillary        | IIIc   | 3     |
| 1129       | 65                     | serous papillary        | IIIc   | 3     |
| 1145       | 41                     | serous papillary        | IIIc   | 3     |
| BJ1        | 40                     | serous papillary        | III    | 3     |
| BJ4        | 56                     | serous papillary        | IIIc   | 3     |
